1 ***Solanum galapagense*-derived purple tomato fruit color is conferred by novel alleles of the**  
2 ***Anthocyanin fruit* and *atroviolacium loci***

3  
4 <sup>1</sup>Sean Fenstermaker, <sup>1</sup>Leah Sim <sup>2,3</sup>Jessica Cooperstone, and <sup>1</sup>David Francis

5  
6 <sup>1</sup>Department of Horticulture and Crop Science, The Ohio State University, Wooster, OH 44691  
7 <sup>2</sup>Department of Food Science and Technology, The Ohio State University, Columbus, OH 43210  
8 <sup>3</sup>Department of Horticulture and Crop Science, The Ohio State University, Columbus, OH 43210  
9

10 **Highlight**

11  
12 *Anthocyanin fruit* and *atroviolacium* confer purple pigmentation in *Solanum galapagense* LA1141  
13 confirming a mechanism described for green-fruited tomatoes. LA1141 alleles cluster with red-fruited  
14 homologs suggesting an independent gain of pigmentation.

15  
16 **Abstract**

17  
18 One hypothesis for the origin of endemic species of tomato on the Galápagos islands postulates a  
19 hybridization of *Solanum pimpinellifolium* and *S. habrochaites*. *S. galapagense* accession LA1141 has  
20 purple fruit pigmentation which has previously been described in green-fruited wild tomatoes such as *S.*  
21 *habrochaites*. Characterization of LA1141 derived purple pigmentation provides a test of the hybridization  
22 hypothesis. Purple pigmentation was recovered in progenies derived from LA1141 and the anthocyanins  
23 malvidin 3-(coumaroyl)rutinoside-5-glucoside, petunidin 3-(coumaroyl) rutinoside-5-glucoside, and  
24 petunidin 3-(caffeoyl)rutinoside-5-glucoside were abundant. Fruit color was evaluated in an introgression  
25 population and three quantitative trait loci (QTLs) were mapped and validated in subsequent populations.  
26 The loci *atroviolacium* on chromosome 7, *Anthocyanin fruit* on chromosome 10, and *uniform ripening* also  
27 on chromosome 10, underly these QTLs. Sequence analysis suggested that the LA1141 alleles of *Aft* and  
28 *atv* are unique relative to those previously described from *S. chilense* accession LA0458 and *S.*  
29 *cheesmaniae* accession LA0434, respectively. Phylogenetic analysis of the LA1141 *Aft* genomic sequence  
30 did not support a green-fruited origin and the locus clustered with members of the red-fruited tomato  
31 clade. The LA1141 allele of *Aft* is not the result of an ancient introgression and underlies a gain of  
32 anthocyanin pigmentation in the red-fruited clade.

33  
34 **Key words**

35  
36 *Anthocyanin fruit*, *atroviolacium*, LA1141, Galápagos Islands, inbred backcross (IBC), purple,  
37 phylogenetics, quantitative trait loci (QTL), *Solanum galapagense*, tomato  
38  
39  
40  
41  
42  
43  
44  
45  
46  
47  
48  
49  
50  
51  
52

## 53 Introduction

54  
55 Rick (1961) hypothesized that species of tomato endemic to the Galápagos, *L. cheesmanii* f. *minor* now  
56 classified as *Solnaum galapagense*, might have resulted from the hybridization of *S. pimpinellifolium* and  
57 *S. habrochaites* progenitors. This hypothesis was based on three unique traits found in both *S.*  
58 *habrochaites* and *S. galapagense*, including alleles of *B* capable of conferring high  $\beta$ -carotene (Lincoln and  
59 Porter, 1950; Tomes et al., 1954). *S. galapagense* also possesses accrescent calyx and pubescence  
60 reminiscent of *S. habrochaites* (Rick, 1961). *S. galapagense* accession LA1141 has purple pigmentation in  
61 immature fruit, similar to species in the green-fruited tomato clade including *S. habrochaites*. The presence  
62 of this fourth trait common to *S. galapagense* and *S. habrochaites* suggested that characterizing the  
63 chemical and genetic basis of purple fruit derived from LA1141 could provide a test of Rick's 1961  
64 hypothesis.

65  
66 The endemic Galápagos tomatoes possess morphological and physiological traits that distinguish them  
67 from other wild species. These traits include orange fruit color at maturity, yellow-green foliage, tiny seed  
68 size, seed dormancy, and affinity for dry conditions (Rick, 1961; Darwin et al., 2003). These species can  
69 hybridize easily with cultivated tomato, making them useful donors of novel alleles (Rick, 1961). There are  
70 several genes from Galápagos tomatoes that have been used in breeding contemporary varieties. An allele  
71 of *uniform ripening* (*u*) from *S. cheesmaniae* accession LA0428 is responsible for uniform distribution of  
72 light green pigmentation in immature fruits (Rick, 1967). Alleles conferring *jointless* ( $j^2$ ) pedicel (Rick, 1956)  
73 and *arthritic articulation* ( $j^{2in}$ ) (Joubert, 1961) have enabled mechanical harvest. *S. cheesmaniae* accession  
74 LA0422 has a recessive allele, *anthocyanin gainer* ( $ag^2$ ), which results in fruit and foliage lacking  
75 anthocyanin at early developmental stages (Rick, 1967; De Jong et al., 2004). Alleles of the *Beta* (*B*) locus  
76 found in all *S. galapagense* and *S. cheesmaniae* accessions confer high  $\beta$ -carotene and the characteristic  
77 orange fruit (Orchard et al., 2021). Alleles of *B* from LA0317 and LA0166 have been introgressed into  
78 cultivated tomatoes (Stommel, 2001). Anthocyanin-mediated purple pigmentation in both the fruit and  
79 foliage was described in *S. cheesmaniae* accession LA0434, the donor of the *atroviolacea* (*atv*) locus (Rick  
80 1956; Rick, 1961; Rick, 1967). Additionally, an accession of *S. cheesmaniae* (LA0428) was described as  
81 having immature fruits with a purple color that resemble *S. peruvianum* (Rick, 1967). Identification and  
82 analysis of loci that confer purple fruit color may shed light on broader questions about the evolutionary  
83 history of the Galápagos tomatoes.

84  
85 Water-soluble vacuolar pigments called anthocyanins cause purple fruit pigmentation in species of  
86 *Solanum* (Timberlake and Bridle, 1982; Mes et al., 2008; Chaves-Silva et al., 2018). The red-fruited tomato  
87 clade corresponds to the group *Lycopersicon* which generally lack anthocyanins in the fruit. The green-  
88 fruited clade is grouped into *Arcanum*, *Eriopersicon* and *Neolycopersicon* based whole genome sequence  
89 phylogeny (The 100 Tomato Genome Sequencing Consortium, et al., 2014). Purple pigmentation is a  
90 characteristic found throughout the green-fruited tomato clade. As an example, *S. habrochaites* accession  
91 LA1777 has pronounced anthocyanin spots in its fruit (Dal Cin et al., 2009). Additionally, *S. peruvianum*  
92 fruit are purple tinged with purple lines and blotches (Muller, 1940). The chemical basis of purple fruit  
93 derived from tomato species in the green-fruited clade is attributed to the anthocyanins petunidin and  
94 malvidin (Jones et al., 2003; Mathews et al., 2003; Ooe et al., 2016). Two loci are known to affect the  
95 regulation of anthocyanin accumulation in tomato fruit, one on chromosome 7 and a second on  
96 chromosome 10. A nonfunctional R3 MYB repressor on chromosome 7 underlies the *atv* locus (Cao et al.,  
97 2017). On chromosome 10, a functional R2R3 MYB-encoding activator gene underlies the *Anthocyanin*  
98 *fruit* (*Aft*) locus described in the donor parent *S. chilense* accession LA0458 (Georgiev, 1972 Jones et al.,  
99 2003; Mes et al., 2008). Additionally, the *aubergine* (*Abg*) locus from *S. lycopersicoides* accession LA2408  
100 results in dark purple fruit (Rick et al., 1994). The *Abg* locus also maps to chromosome 10 and may be  
101 allelic to *Aft* (Rick et al., 1994). The synergistic interaction between a nonfunctional R3 MYB repressor *atv*  
102 and a functional R2R3 MYB activator at *Aft* elevates anthocyanin levels in tomato fruit and imparts purple  
103 color (Povero et al., 2011; Colanero et al., 2020 a Yan et al., 2020).

104  
105 We conducted experiments aimed at describing the chemical and genetic basis of purple pigmentation in  
106 fruit derived from LA1141. Our results are consistent with the regulatory mechanism described for

107 accessions from the green-fruited tomato clade. However, the LA1141 alleles of *Aft* and *atv* are distinct  
108 from those previously characterized. Phylogenetic analysis of *Aft* sequence does not support a green-  
109 fruited origin of the LA1141 locus which suggests that purple fruit pigmentation in this accession is the  
110 result of a convergent or parallel mechanism resulting from a loss of function that disrupts *atv* and a gain  
111 of function that restores *Aft*. These findings fail to support Rick's 1961 hypothesis on the origin of the  
112 Galápagos tomatoes.

113

## 114 **Materials and methods**

115

### 116 *Plant materials and growing conditions*

117

118 An inbred backcross (IBC) population was initiated in 2014 for the simultaneous introduction and  
119 characterization of purple pigmented fruit. The IBC population was derived from an initial hybridization  
120 of *Solanum galapagense* S.C. Darwin and Peralta (formerly *Lycopersicon cheesmaniae* f. minor) (Hook. f)  
121 C.H.Mull.) accession LA1141 as the female parent and *Solanum lycopersicum* L. (formerly *Lycopersicon*  
122 *esculentum* Mill) OH8245 as the male parent. Accession LA1141 was acquired from the C.M. Rick Tomato  
123 Genetic Resources Center, University of California, Davis, CA, USA. The processing tomato variety  
124 OH8245 was described previously (Berry et al., 1991). A single LA1141 × OH8245 F<sub>1</sub> plant was  
125 backcrossed as the female parent to OH8245. BC<sub>1</sub> individuals were then separately backcrossed again  
126 with OH8245 as the pollen donor. BC<sub>2</sub> plants were then self-pollinated with single seed descent in  
127 alternating greenhouse and field production cycles to create a BC<sub>2</sub>S<sub>3</sub> IBC population composed of 160  
128 inbred backcross lines (IBLs). During these studies, the IBC population was further inbred to BC<sub>2</sub>S<sub>5</sub>. The  
129 BC<sub>2</sub>S<sub>3</sub> IBLs SG18-124 (Fig. 1C) and SG18-200 (Fig. 1B) were selected based on purple pigmentation in  
130 the fruit to generate populations for validation of quantitative trait loci (QTLs). The IBLs SG18-124 and  
131 SG18-200 were again crossed to OH8245, and the self-pollination of the resulting F<sub>1</sub> plants created  
132 populations with F<sub>2</sub> segregation for specific LA1141 chromosomal regions.

133

134 Seedling care for greenhouse and field trials followed the same protocol. The 160 BC<sub>2</sub>S<sub>3</sub> IBLs and the  
135 SG18-124 and SG18-200 derived F<sub>2</sub> progenies were sown in 288-cell trays with a cell volume of 13 ml.  
136 Greenhouse temperatures were set to 27 °C during the day and 25 °C at night with a 16-hour photoperiod.  
137 Photosynthetically active radiation (PAR) was supplied by natural sunlight, 1000-W metal-halide lamps  
138 (Multi-Vapor® GE Lighting, East Cleveland, OH, USA), and 1000-W high-pressure sodium lamps (Ultra  
139 Sun® Sunlight Supply, Vancouver, WA) with a target radiation of 250 W m<sup>-2</sup> or approximately 113 μmol m<sup>-2</sup>  
140 s<sup>-1</sup> PAR. Fertilization was applied using a 20-20-20 fertilizer (20 percent N, 20 percent P<sub>2</sub>O<sub>5</sub>, and 20  
141 percent K<sub>2</sub>O) (Jack's professional All-Purpose Fertilizer, JR Peters INC., Allentown, PA, USA) delivered at  
142 a concentration of 1000 mg L<sup>-1</sup> twice per week. Plants were irrigated once or twice per day as needed.

143

144 IBC and F<sub>2</sub> progenies were evaluated in field trials as single plants. The BC<sub>2</sub>S<sub>3</sub> IBC population was  
145 evaluated with 60 cm spacing and 164 plants, including controls. Progenies derived from SG18-124 and  
146 SG18-200 were transplanted for greenhouse and field evaluations of pigmentation in the fruit. Plants with  
147 three to five expanded leaves were transferred to 3.78 L containers (Hummert, EARTH City, MO) and  
148 spaced 30 cm apart on the greenhouse bench. There were 36 F<sub>2</sub> plants evaluated in the greenhouse. The  
149 remaining SG18-124 and SG18-200 derived F<sub>2</sub> progenies were evaluated in field trials with 60 cm spacing  
150 with a total of 145 plants harvested.

151

### 152 *Tomato Fruit Color Measurements*

153

154 Three mature green fruit were randomly selected from each plot and measured at the midpoint between  
155 the shoulder and the blossom end of the fruit. Color was measured with a colorimeter (chromameter CR-  
156 300; Minolta Camera Co., Ltd., Ramsey, NJ, USA). Values of the red, green, yellow, and blue components  
157 of fruit were obtained using the "L\*a\*b\*" CIELAB color space (Commission Internationale de l'Eclairage,  
158 1978). The L\* coordinate represented a measure of the darkness or lightness. Coordinates, a\* and b\*, are  
159 measured color along the axis of a color wheel with +a\* in the red direction, and -a\* in the green direction,

160 +b\* in the yellow direction, and -b\* in the blue direction (Kabelka et al., 2004). Chroma and hue were  
161 derived from measurements of a\* and b\*. Chroma was calculated as  $(a^{*2} + b^{*2})^{1/2}$  and was used to measure  
162 of how bright or dull a color was. Hue was calculated using the equation  $(180/\pi) [\cos^{-1} (a^*/\text{chroma})]$  for  
163 positive values of a\*. For negative values of a\*, we calculated hue using the equation  $360 - (180/\pi) [\cos^{-1}$   
164  $(a^*/\text{chroma})]$  (Kabelka et al., 2004; Darrigues et al., 2008). The average values of hue, chroma, and L\* were  
165 used as the response variable for our genetic studies.

166

#### 167 *Anthocyanidin extraction, analysis, and identification*

168

169 Tomato fruit samples at different stages of maturity from SG18-124 × OH8245 derived F<sub>2</sub> plants were  
170 blended, and 3.5 g of juice was extracted with 4 ml 1% HCl in MeOH. The extracts were dried under  
171 nitrogen gas. Anthocyanins were separated using an C18 column (HSS T3, 2.1×100mm, 1.8μm, Agilent  
172 Technologies) and a gradient of water (A) and acetonitrile (B), both with 5% formic acid. The gradient was  
173 as follows: isocratic with 0% B from 0-2 min, linear gradient to 30% B from 2-8 min, linear gradient to  
174 100% from 8-12 min, hold at 100% B for 1 min, and return to initial conditions. Samples were run on an  
175 Agilent 1290 ultra-high-performance liquid chromatography (UHPLC) with photodiode array (PDA)  
176 detection, coupled to a high resolution 6545 quadrupole time-of-flight mass spectrometer (QTOF-MS)  
177 (Agilent, Santa Clara, CA, USA). The MS was run using electrospray ionization and operated in both  
178 positive and negative modes using reference masses for accurate mass determination.

179

#### 180 *DNA isolation and genotyping*

181

182 Genomic DNA was isolated from fresh, young leaf tissue from the 160 BC<sub>2</sub>S<sub>3</sub> progenies, 96 of each F<sub>2</sub>  
183 population, and parental lines using a modified CTAB method consistent with previous studies (Sim et  
184 al., 2015). Single-nucleotide polymorphisms (SNPs) between OH8245 and LA1141 were identified using a  
185 384-marker panel (Bernal et al., 2020). Genotyping of the BC<sub>2</sub>S<sub>3</sub> progenies was performed using the  
186 PlexSeq™ platform as a service (Agriplex Genomics, Cleveland, OH, USA) to detect specific SNPs through  
187 a pooled amplicon sequencing strategy.

188

#### 189 *Marker development for candidate genes*

190

191 Selected SNP markers and candidate genes were converted to polymerase chain reaction (PCR) based  
192 insertion/deletion (INDEL) markers for visualization on agarose gels. These markers, when appropriate,  
193 were added to the linkage maps described below. A summary containing forward and reverse primers,  
194 genome location, and expected polymorphism for these markers is available at  
195 <https://doi.org/10.5281/zenodo.5650150> (Fenstermaker et al., 2021a). Candidate genes included MYB  
196 transcription factor sequences corresponding to *atv* [MF197509, NC\_015447.3 (Cao et al., 2017)], *Aft*  
197 [EF433416; EF433417; MN433086; MN433087; FJ705319; NC\_015447.3 (Mes et al., 2008; Sapir et al.,  
198 2008; Cao et al., 2017)], *GOLDEN2-LIKE (GLK2)* transcription factor sequences corresponding to *u*  
199 [JX163897; JQ316459; NC\_015447.3 (Powell et al., 2012)], and *Lycopene β-cyclase (Cyc-B)* sequences  
200 corresponding to *B* [KP233161, (Orchard, 2014)]. These sequences were targeted as candidate genes  
201 based on initial quantitative trait locus (QTL) mapping and because of their previously known effects on  
202 tomato fruit color. The INDEL and cleaved amplified polymorphism sequences (CAPS) markers were  
203 developed using a sequence comparison approach between, *S. lycopersicum* variety Heinz 1706, *S.*  
204 *galapagense* accession LA1044, *Solanum cheesmaniae* (L.Riley) Fosberg, 1987 1) in [Fosberg FR (1987b)]  
205 (formerly *Lycopersicon cheesmaniae* L.Riley, 1925 in [Riley LAM (1925c)] accession LA0483, *S.*  
206 *cheesmaniae* accession LA1401, and *S. lycopersicum* variety Indigo Rose. Primers were designed using  
207 Primer3 (v.0.4.0) (Untergasser et al., 2012). These primers were used to genotype LA1141, OH8245, the  
208 BC<sub>2</sub>S<sub>3</sub> IBC population, and the subsequent F<sub>2</sub> progenies derived from IBL selections SG18-124 and SG18-  
209 200.

210

211 PCR was carried out with an initial incubation at 94 °C for 3 min, followed by 40 cycles of denaturation at  
212 94 °C for 30 s, annealing at 52 °C for 30 s, and extension at 72 °C for 60 s. A final elongation step at 72



213 °C was carried out for 7 min after completing the cycles. The PCR products for markers detected as CAPS  
214 were digested with a restriction enzyme (Fenstermaker et al., 2021a) for two hours at 37 °C. The PCR  
215 products were separated on a 2.5% agarose gel.

#### 216 *Linkage map construction*

217

218 A genetic linkage map was constructed based on the IBC population. The R/qtl package version 1.47-9  
219 was used in the R statistical software environment version 4.0.3 (Broman et al., 2003; R Core Team, 2020).  
220 We used the “read.cross” function from BC<sub>s</sub>F<sub>t</sub> tools to read in data, with s = 2 and t = 3 (Shannon et al.,  
221 2013). Of the 384 SNPs in the marker panel, 157 were polymorphic in the IBC population, and no markers  
222 were removed. A summary of the 157 polymorphic SNPs is available at  
223 <https://doi.org/10.5281/zenodo.5650152> (Fenstermaker et al., 2021b). The genetic map was constructed  
224 by using the “est.map” function in R/qtl. Markers were placed in the same linkage group if they had a  
225 logarithm of the odds (LOD) score greater than 1.8 and an estimated recombination fraction lower than  
226 0.45. The Kosambi map function was used for map construction and to convert recombination frequency  
227 to genetic distance (Kosambi 1944). The marker order in each linkage group was estimated with the  
228 functions “orderMarkers” and “ripple” in R/qtl. Changes in chromosome length and loglikelihood were  
229 investigated, dropping one marker at a time with the function “droponemarker” in R/qtl. Marker order was  
230 compared to the physical position in the Tomato Genome version SL4.0 (Hosmani et al., 2019) using both  
231 linear (adjusted correlation coefficient R<sup>2</sup>) and rank regression (rho(ρ)) to assess linkage map quality.

232

#### 233 *QTL Analysis in BC<sub>2</sub>S<sub>3</sub> IBLs*

234

235 Composite interval mapping (CIM) was used for QTL detection (Zeng, 1994) using the “cim” function in  
236 the R/qtl package (Broman et al., 2003). Analysis was performed using a 2 cM step, one marker selected  
237 as a cofactor, and a 40 cM window with cofactor and window selected due to limited recombination and  
238 expected skewed segregation in the BC<sub>2</sub>S<sub>3</sub> population. Haley Knott regression (Haley and Knott, 1992)  
239 (hk) was chosen as the solution-generating algorithm. Significance thresholds were generated by using  
240 the permutation test (α = 0.05, n = 1000; Churchill and Doerge, 1994). The resampled LOD cutoffs used  
241 were LOD = 6.8 for hue, LOD = 4.5 for chroma, and LOD = 3.65 for L\*. Genetic effects were evaluated as  
242 differences between phenotype averages expressed as regression coefficients using the “fitqtl” function  
243 with the argument “get.ests=TRUE” and “dropone=FALSE” in R/qtl. Additionally, percent variance  
244 explained was estimated by the “fitqtl” function with the argument “dropone=TRUE” in R/qtl.

245

#### 246 *QTL validation*

247

248 The IBLs SG18-124 and SG18-200 were chosen because of pigmentation in their fruit (Fig. 2B, C).  
249 Segregating SG18-124 × OH8245 F<sub>2</sub> and SG18-200 × OH8256 F<sub>2</sub> progenies were sown in the field and  
250 greenhouse, and fruit pigmentation was measured using the Minolta CR300 colorimeter as described  
251 above. Seedlings were also grown as previously described. Marker data were scored on 91 progenies  
252 derived from the SG18-124 × OH8245 F<sub>2</sub> population and 90 from the SG18-200 × OH8245 F<sub>2</sub> population.  
253 Genetic effects and allele substitutions were evaluated using linear model ANOVA as implemented by the  
254 “lm” function in the R core package (R Core Team, 2020). The linear model  $Y = \mu x + M + E$ : where Y was  
255 the color trait value,  $\mu x$  was equal to the population mean, M was the effect of each marker allele, and E  
256 was the associated error, equivalent to genotype (marker). We compared the marker-locus genotypic  
257 classes of homozygous LA1141 *Aft* (*Aft/Aft*) and homozygous LA1141 *atv* (*atv/atv*), homozygous OH8245  
258 *Aft* (*AFT/AFT*) and homozygous OH8245 *atv* (*ATV/ATV*), and all possible marker-locus class combinations.  
259 For consistency, the marker-locus genotypic class notation followed previous publications (Cao et al.,  
260 2017). The markers Ant1\_1 (*Aft*), An2-like\_exon2\_intron2 (*Aft*), *atv\_ex4* (*atv*), *u\_gal\_3* (*u*), and BetaRSA (*B*)  
261 were tested. The Marker evaluations were conducted in both F<sub>2</sub> populations independently. We used F-  
262 tests as previously described to determine if hue, chroma, and L\* were associated with significant  
263 differences in marker-locus genotypic classes and used the mean phenotypic differences to estimate the  
264 effect of allele substitutions.

265

266 Additionally, we tested the pairwise combination of Ant1\_1 (*Aft*) and atv\_ex4 (*atv*), in the IBC and F<sub>2</sub>  
267 populations. We used the linear model  $Y = \mu x + M_1 + M_2 + M_1:M_2 + E$ : where  $Y$  was the color trait value,  $\mu$   
268  $x$  was equal to the population mean,  $M_1$  and  $M_2$  were effects of individual marker alleles,  $M_1:M_2$  was the  
269 interaction between marker alleles, and  $E$  was the associated error, equivalent to genotype (marker) to test  
270 for significant markers interactions. We conducted a linear model analysis of variance (ANOVA) using the  
271 “lm” function in the R core package (R Core Team, 2020) to test the pairwise combination of chromosome  
272 7 (*atv*) and chromosome 10 (*Aft*). If marker classes were significantly different ( $p < 0.05$ ) we used a Tukey's  
273 Honest Significant Difference test, with the “HSD.test” function in the R package Agricolae (De Mendiburu,  
274 2017) to compare means.  
275

## 276 *Sequence alignment and phylogeny*

277

278 A PCR amplification strategy was used for sequencing the *Aft* candidate sequences derived from LA1141  
279 and OH8245. Amplified products were purified by precipitation using a 9:1 ethanol: sodium acetate (3 M),  
280 pH 5.2 mixture. Sequencing was performed at the Molecular and Cellular Imaging Center in Wooster, Ohio,  
281 using a di-deoxy Sanger procedure on an ABI Prism Sequencer 3100x1 (Grand Island, NY, USA). For each  
282 amplicon, the DNA sequence was generated in forward and reverse directions. All sequence data were  
283 quality checked and trimmed before alignment. We used the UGENE v. 37 software package  
284 (Okonechnikov et al., 2012) to create contigs from the forward and reverse sequence generated sequence  
285 from LA1141 and OH8245 corresponding to MYB-encoding genes underlying *atv* and *Aft*.  
286

## 287 *Bioinformatics pipeline*

288

289 Genomes from 84 unique cultivated and wild tomato accessions published as part of the 100 Tomato  
290 Genome Sequencing Consortium (The 100 Tomato Genome Sequencing Consortium, et al., 2014) and a  
291 reference quality whole genome sequence for OH8245 generated as part of a collaboration between the  
292 Tomato Pan Genome Consortium and NRGene (Ness-Ziona, Israel; see:  
293 <https://www.nrgene.com/solutions/consortia/tomato/>) were stored on the Ohio Supercomputer Center  
294 (OSC) (Ohio Supercomputer center, 1987) computing environment and a nucleotide BLAST database  
295 was created using the function “makeblastdb” in the Basic Local Alignment Search Tool (BLAST)  
296 version/2020-04 (Altschul et al., 1990) program. Our workflow parsed through sequence matches,  
297 identified the highest quality match, and created a FASTA file containing the match as a FASTA output  
298 file. Parsing was facilitated by “SearchIO”, “Seq”, and “SeqIO”, functions in BioPerl (Stajich et al., 2002)  
299 following implementation of the “blastn” function in the BLAST core package. The steps in the pipeline  
300 were automated using the Bash scripting language (Gnu, 2007) in a Unix shell on the OSC.  
301

302 Passport data for all accessions and a summary of sequences including genomic and coding sequence  
303 (CDS) length is available at <https://doi.org/10.5281/zenodo.5650141> (Fenstermaker et al., 2021c). The  
304 genomic sequences and CDS were retrieved from regions corresponding to the tomato *Aft* locus from  
305 LA1141, OH8245, Heinz1706 as described above. CDS corresponding to MYB encoding genes  
306 corresponding to LA1141, OH8245 and the 84 tomato accessions published as part of The 100 Tomato  
307 Genome Sequencing Consortium (The 100 Tomato Genome Sequencing Consortium, et al., 2014) were  
308 determined by comparing genomic sequences to the Heinz reference Tomato Genome CDS (ITAG release  
309 4.0) available from the Solanaceae Genome Network (SGN) (available at:  
310 [https://solgenomics.net/organism/Solanum\\_lycopersicum/genome](https://solgenomics.net/organism/Solanum_lycopersicum/genome)). Additional CDS sequences were  
311 retrieved from the National Center for Biotechnology Information (NCBI) from the following Genbank  
312 records: Indigo Rose [MN433087 (Yan et al., 2020)], *S. lycopersicum* accession LA1996 [MN242011.1,  
313 EF433417.1 (Sapir et al., 2008; Colanero et al., 2020a)], *S. chilense* (Dunal) Reiche (formerly *Lycopersicon*  
314 *chilense* Dunal), and accession LA1930 [MN242012.1 (Colanero et al., 2020a)].  
315

316 Orthologous sequences corresponding to tomato *Aft* were retrieved from *S. lycopersicoides* Dunal  
317 accession LA2951 genome (v0.6) made available by The *Solanum lycopersicoides* Genome Consortium  
318 (Powell et al., 2020). *Solanum tuberosum* L. Group Phureja clone DM1-3 genome (PGSC DM v4.03

319 Pseudomolecules) made available by the Potato Genome Sequence Consortium (PGSC: Potato Genome  
320 Sequencing Consortium et al., 2011 and *Capsicum annuum* L., 1753 in [Linnaeus C (1753c)] cv. CM334  
321 genome (*Capsicum annuum* cv CM334 genome chromosome release 1.55, Hulse-Kemp et al. 2018).  
322 These corresponding sequences were retrieved using the BLAST tool at:  
323 <https://solgenomics.net/tools/blast/>. Comparison of syntenic chromosomal regions were made using  
324 known marker positions of tomato, potato, and pepper and the comparative map viewer (available at  
325 <https://solgenomics.net/cview>) on chromosome 10. Orthologous sequences corresponding to *Salvia*  
326 *miltiorrhiza* Bunge, 1833 [KF059503.1, (Li and Lu, 2014)], *Arabidopsis thaliana* (L.) Heynh., 1842  
327 (*Arabidopsis*), [NM\_105308.2, NM\_105310.4 (Teng et al., 2005, Cominelli et al., 2008; Beradini et al., 2015)]  
328 were chosen based on homology and gene annotation that described positive R2R3 MYB regulation of  
329 anthocyanins.

330

331 The CDS corresponding to the *Aft* genes were retrieved from the CDS reference genomes available from  
332 the Sol Genomics Network (SGN): Tomato Genome CDS (ITAG release 4.0), Potato PGSC DM v3.4 CDS  
333 sequences, *Capsicum annuum* cv CM334 Genome CDS (release 1.55) or from NCBI available at:  
334 <https://www.ncbi.nlm.nih.gov>. To retrieve CDS sequence from NCBI, we accessed the “RefSeq” section  
335 of the Genbank records mentioned above. The CDS was extracted from the “features” section of the  
336 Genbank records and exported as FASTA files. The UGENE v. 37 software package (Okonechnikov et  
337 al., 2012) was used for sequence trimming prior to alignment using MUSCLE (version 3.8.31) (Edgar,  
338 2004) in the OSC Unix command line.

339

340 Phylogenetic trees were constructed using the phangorn R package (Schliep, 2011) for the R2R3 MYB-  
341 encoding genes *Ant1*, *An2-like*. Genomic sequence files were combined from the MYB encoding genes  
342 *An2-like* and *Ant1* to create a single *Aft* locus contig, aligned in MUSCLE and imported into phangorn. We  
343 constructed Maximum likelihood trees based on the nucleotide alignment using the general time reversible  
344 model with the rate variation among sites described by a gamma distribution and the proportion of  
345 invariable sites (a.k.a. GTR+G+I model). The “optim.pml” function was used to optimize model parameters  
346 with a stochastic search algorithm to compute the likelihood of the phylogenetic trees (Nguyen et al.,  
347 2015). This methodology was used for both genomic and CDS sequences. Clade support was estimated  
348 with 1000 bootstrap replicates using the function “bootstrap.pml”. Phylogenetic trees were midpoint  
349 rooted for phylogenetic studies that used genomic sequence and rooted using *Arabidopsis* as an outgroup  
350 for phylogenetic studies that used CDS. Trees were drawn and annotated using the Interactive Tree Of  
351 Life (ITOL) (Letunic and Bork, 2021; available at <https://itol.embl.de/>).

352

## 353 Results

354

### 355 Accession LA1141 phenotypic description

356

357 We observed purple pigmentation in the mature green (MG) fruit of LA1141 (Fig. 1A), and we were able to  
358 recover purple fruit in BC<sub>2</sub>S<sub>3</sub> progenies (Fig. 1B, C). Purple pigmentation occurred in the skin and the  
359 pericarp tissues beneath the skin. Pigmentation was visible at all fruit maturity stages, but most apparent  
360 at the MG stage. The interior of the fruit did not contain visible purple pigment. Fruit hue values in the  
361 inbred backcross (IBC) progenies ranged from 231.27 to 283.35 degrees with a mean of 240.75 degrees  
362 for the population. Hue values greater than 250 degrees were designated as “deep purple” (Fig. 1C).  
363 Progenies with hue values that ranged between 245 and 250 degrees also had visible spotting or speckling  
364 of purple pigment. We designated progenies in this range of hue as “light purple” (Fig. 1B). All hue values  
365 measured on fruit below 245 degrees were green (Fig. 1D). Inbred backcross lines (IBLs) with purple  
366 pigmentation in the fruit had hue values greater than 245 degrees, L\* values ranging from 44.4 to 64.29  
367 units, and chroma values ranging from 7.91 to 35.22 units. We expected the LA1141 × OH8245 BC<sub>2</sub>S<sub>3</sub> IBC  
368 population to be roughly 87.5% recurrent parent (OH8245), with the remaining 12.5% representing random  
369 introgressions from the LA1141 donor parent. The observed segregation of individuals with deep purple  
370 phenotypes approximated the expected genotypic percentages for two unlinked loci ( $\chi^2=0.339$ ,  $p=0.843$ ).  
371 Plants with deep purple fruit (Fig. 1C) also display darker green leaves with purple veins and purple

372 pigmentation in the stems. In contrast, plants with the light purple phenotypes (Fig.1B) could be explained  
373 by a single introgression ( $\chi^2 = 2.053$ ,  $p = 0.358$ ).  
374

375 Chemical analysis of LA1141 × OH8245 BC<sub>2</sub>S<sub>3</sub> derived purple tomatoes

376  
377 We used UHPLC-PDA-QTOF-MS to identify compounds that absorb light at 520 nm, which is  
378 characteristic of anthocyanins. The peaks in the chromatogram (Fig. 2) indicate the predominant  
379 anthocyanidins were petunidin and malvidin based on accurate masses previously published (Mathews et  
380 al., 2003, Ooe et al., 2016). Petunidin-3-(caffeoyl)rutinoside-5-glucoside (C<sub>43</sub>H<sub>49</sub>O<sub>24</sub><sup>+</sup>) was identified at a  
381 retention time of 6.46 minutes and had an observed mass [M<sup>+</sup>] of 949.2623 (1 ppm mass error), petunidin-  
382 (coumaroyl)rutinoside 5-glucoside (C<sub>43</sub>H<sub>49</sub>O<sub>23</sub><sup>+</sup>) at a retention time of 6.85 minutes with a mass [M<sup>+</sup>] of  
383 933.2686 (2 ppm mass error), and malvidin-3(coumaroyl)rutinoside-5-glucoside (C<sub>44</sub>H<sub>51</sub>O<sub>23</sub><sup>+</sup>) at a retention  
384 time of 7.22 minutes with a mass [M<sup>+</sup>] of 947.2834 (1.3 ppm mass error) (Fig. 2). These anthocyanins are  
385 present in all fruit maturity stages. We see a change in the predominant anthocyanins from the MG to  
386 breaker fruit stage (Fig. 2). The anthocyanins petunidin-(coumaroyl)rutinoside 5-glucoside and  
387 anthocyanin malvidin 3(coumaroyl)rutinoside-5-glucoside are of similar intensity at MG (Fig. 2). The  
388 anthocyanin Petunidin-(coumaroyl)rutinoside 5-glucoside was the predominant anthocyanin at breaker  
389 and ripe stages (Fig. 2). Additionally, we observed changes in individual anthocyanin abundance over  
390 ripening (Fig. 2). The anthocyanin Malvidin 3(coumaroyl)rutinoside-5-glucoside was most abundant at the  
391 MG stage (Fig. 2). The anthocyanins Petunidin-(coumaroyl)rutinoside 5-glucoside and petunidin-3-  
392 (caffeoyl)rutinoside-5-glucoside are most abundant at the breaker stage (Fig. 2).  
393

394 *LA1141 × OH8245 BC<sub>2</sub>S<sub>3</sub> linkage map quality*

395  
396 Linkage maps were constructed based on marker data from the BC<sub>2</sub>S<sub>3</sub> IBC population and defined 13  
397 linkage groups corresponding to each tomato chromosome. We split chromosome 1 into two linkage  
398 groups (1a and 1b) because of a recombination fraction greater than 0.45 between adjacent markers. The  
399 total number of markers in each linkage group ranged between 2 and 27, and linkage group 4 had the  
400 most markers at 27 (Table 1). The centimorgan (cM) length per linkage group ranged between 25.8 and  
401 121.6 cM (Table 1). The average cM distance between markers was 8.1, and the largest distance in cM  
402 between markers was 41.8 (Table 1). Single nucleotide polymorphism (SNP) marker physical position using  
403 the tomato Sl4.0 physical map (Hosmani et al., 2019) agreed with the estimated genetic position using  
404 both linear correlation and rank correlation (Table 1). As previously demonstrated, correlations are not  
405 perfectly linear due to reduced recombination in the centromere (Sim et al., 2012). Linear correlations  
406 ranged from 0.28-0.99, while rank correlations ranged from 0.96 to 1 (Table 1).  
407

408 *Quantitative trait loci analysis of tomato color in the LA1141 × OH8245 BC<sub>2</sub>S<sub>3</sub> population*

409  
410 We identified three putative QTLs that explained between 8.24 and 35.53% of the total phenotypic  
411 variation for hue, chroma and L\* (Fig. 3; Table 2). All QTLs that contribute to purple color are derived from  
412 the LA1141 donor parent with purple pigmentation defined by an increase in hue and a decrease in both  
413 chroma and L\* (Table 2). A region on the distal arm of chromosome 10 explained between 22.63 and  
414 24.04% of the total phenotypic variation, and increased hue between 6.74 and 7.5 degrees (Fig. 3; Table  
415 2). Two QTLs, one on the proximal arm and one on the distal arm of chromosome 10, were associated  
416 with chroma and explained between 18.02 and 28.53% (proximal arm) and between 15.95 and 23.08%  
417 (distal arm) of the total phenotypic variance (Fig. 3; Table 2). These QTLs decreased chroma between 3.96  
418 and 17.53 units (proximal arm) and 6.26 and 8.42 units (distal arm) (Fig. 3; Table 2). Two QTLs were  
419 associated with L\*, one on chromosome 6 and one on chromosome 10 (proximal) (Fig. 3; Table 2). These  
420 QTLs explained between 8.24 and 35.53% of the total phenotypic variation (Table 2). The QTL on  
421 chromosome 10 explained between 22.03 and 35.53% of the phenotypic variation and reduced L\* by 9.23  
422 units (Table 2). The QTL on chromosome 6 explained between 8.24 and 10.13% of the phenotypic variation  
423 and reduced L\* between 4.53 and 5.05 units (Table 2).



424

#### 425 *Candidate genes*

426

427 Candidate genes were selected because of their previously characterized role in regulating tomato fruit  
428 pigmentation and because of their locations within the physical interval of our QTL (Table 2). The R2R3  
429 MYB-encoding candidate genes *Ant1* (*Aft*) (Sapir et al., 2008) and *An2-like* (*Aft*) (Qiu et al., 2019; Yan et  
430 al., 2020) are located within the QTL interval on the distal arm of chromosome 10 (Table 2). The MYB  
431 encoding genes *Ant1* and *An2-like* are members of the multi-gene MYB family associated with the *Aft*  
432 locus (Yan et al., 2020). The transcription factor *Golden2-like 2* (*u*) (Powell et al., 2012) maps to the proximal  
433 arm of chromosome 10 within the QTL regions identified for L\* and chroma (Table 2). Additionally, we  
434 chose the fruit-specific *Cyc-B* gene (*B*) to investigate the QTL on chromosome 6 because accession  
435 LA1141 has the characteristic ripe orange fruit associated with the *Beta* locus (Orchard et al., 2021). We  
436 chose The R3 MYB repressor *atv* (*atroviolacea*) on chromosome 7 (Cao et al., 2017; Colanero et al., 2018)  
437 because of its previously described synergistic interaction with *Aft* which results in a purple phenotype  
438 similar to what we observe in our deep purple accession (Fig. 1C). We added these markers to the linkage  
439 maps described above and used them in our QTL analysis.

440

#### 441 *QTL mapping using candidate genes in the IBC population*

442

443 Genetic evidence supports a role for *Aft*, *atv* and *u* conferring purple pigmentation in the fruit of LA1141.  
444 The markers corresponding to the MYB-encoding genes *Ant1* (*Ant1\_1* (*Aft*)) and *An2-like* (*An2-*  
445 *like\_exon2\_intron2* (*Aft*)) are physically near one another (Hosmani et al., 2019) (Table 2) and genetically  
446 linked ( $\chi^2 = 3.36$ ,  $p = 0.186$ ). For measurements of hue, the markers *Ant1\_1* (*Aft*) and *An2-like\_exon2\_intron2*  
447 (*Aft*) (LOD=9.4) fell above our resampled logarithm of the odds (LOD) cutoff (LOD=6.8), explained 24.04 %  
448 of the phenotypic variation, and increased hue by 7.05 degrees (Table 2). The markers *BetaRSA* (*B*)  
449 (LOD=2.74), *atv\_ex4* (*atv*) (LOD=2.6), and *u\_gal\_3* (*u*) (LOD=2.65) did not fall above our resampled LOD  
450 cutoffs for hue (Table 2).

451

452 The markers *Ant1\_1* (*Aft*) and *An2-like\_exon2\_intron2* (*Aft*) (LOD=14.24) fell above our resampled LOD  
453 cutoffs for chroma (LOD=4.5). The markers *Ant1\_1* (*Aft*) and *An2-like\_exon2\_intron2* (*Aft*) explained  
454 23.08% of the total phenotypic variance and reduced chroma by 8.24 units (Table 2). The marker *u\_gal\_3*  
455 (*u*) (LOD=12) also fell above our resampled LOD cutoffs, explained 28.53 % of the total phenotypic  
456 variation, and reduced chroma by 17.53 units (Table 2). The markers *BetaRSA* (*B*) (LOD=2.74) and *atv\_ex4*  
457 (*atv*) (LOD=2.61) did not fall above our resampled LOD cutoff for chroma (Table 2).

458

459 Regions on chromosome 6 and the proximal arm of chromosome 10 were targeted for measurements of  
460 L\*. The marker *u\_gal\_3* (*u*) (LOD=15.25) fell above our resampled LOD cutoff (LOD=3.65). The marker  
461 *u\_gal\_3* (*u*) explained 35.53 % of the total phenotypic variance and reduced L\* by 9.32 units (Table 2). The  
462 marker *BetaRSA* (*B*) (LOD=1.26) did not fall above our resampled LOD cutoff for L\* and our QTL analysis  
463 failed to support a role for *B* as a candidate gene on chromosome 6. Additionally, the markers *Ant1\_1* (*Aft*)  
464 and *An2-like\_exon2\_intron2* (*Aft*) (LOD=1.13), and *atv\_ex4* (*atv*) (LOD=1.48) did not appear to be  
465 associated with L\* (Table 2).

466

467 Although the marker *atv\_ex4* (*atv*) did not fall above our LOD significance thresholds for hue, chroma, or  
468 L\* (Table 2), segregation rates of the deep purple phenotype in the BC<sub>2</sub>S<sub>3</sub> progenies suggested two  
469 unlinked loci were responsible. The known regulatory mechanism involving MYB encoding genes  
470 underlying *atv* and *Aft* led us to pursue the interaction effects of the combined loci on chromosome 7 and  
471 on chromosome 10. The interaction between homozygous LA1141 *Aft* (*Aft/Aft*) and the homozygous  
472 LA1141 *atv* (*atv/atv*) was significant ( $p < 2.2e-16$ ) (Fig. 4). We compared the hue values of BC<sub>2</sub>S<sub>3</sub> IBL  
473 progenies that were *Aft/Aft atv/atv* to homozygous OH8245 *Aft* (*AFT/AFT*) and homozygous OH8245 *atv*  
474 (*ATV/ATV*) (Fig. 4A). The BC<sub>2</sub>S<sub>3</sub> IBLs with both the *Aft* and *atv* locus, which is notated as the *Aft/Aft atv/atv*  
475 genotype had higher hue values than the *AFT/AFT ATV/ATV* genotypes (Fig. 4A). Additionally, we  
476 compared all possible marker-locus class combinations, including the genotypes *Aft/Aft ATV/ATV*, and

477 *AFT/AFT atv/atv*. The *Aft/Aft atv/atv* genotype had higher hue values than all other genotypes (Fig. 4A).  
478 However, the *Aft/Aft ATV/ATV* genotype had higher hue values than the *AFT/AFT atv/atv* and *AFT/AFT*  
479 *ATV/ATV* genotypes (Fig. 4A).

480

#### 481 *Confirmation of QTLs in the F<sub>2</sub> validation populations*

482

483 We evaluated F<sub>2</sub> populations originating from the selected IBL progenies SG18-124 (Fig. 1C) and SG18-  
484 200 (Fig. 1B) for measurements of hue, chroma, and L\* to validate the QTLs identified in the BC<sub>2</sub>S<sub>3</sub>  
485 generation. The IBL SG18-124 had deep purple fruit (Fig. 1C). The mean hue value of the SG18-124  
486 derived F<sub>2</sub> population was 238.5 degrees and ranged from 227.24 to 284.4 degrees. The mean chroma  
487 value was 24.8 units and ranged from 5.7 to 39 units. The mean L\* value was 46.3 units and ranged from  
488 30.3 to 67.1 units. The IBL SG18-200 had light purple fruit (Fig. 1B). The mean hue value in the SG18-200  
489 derived F<sub>2</sub> population was 239.7 degrees and ranged from 234.8 to 264 degrees. The mean chroma value  
490 was 29.1 and ranged from 13.7 to 33.79 units. The mean L\* value was 52.2 and ranged from 42.3 to 60.2  
491 units.

492

493 In the SG18-124 derived F<sub>2</sub> population the markers Ant1\_1 (*Aft*) ( $P=1.513e-09$ ), An2-like\_exon2\_intron2  
494 (*Aft*) ( $p=2.118e-09$ ) were significantly associated with hue. The markers Ant1\_1 (*Aft*) and An2-  
495 like\_exon2\_intron2 (*Aft*) both explained 37% of the phenotypic variation, and increased hue by 19.45 and  
496 22.05 degrees respectively (Table 3). The marker *atv\_ex4* (*atv*) ( $p=0.022$ ) was also significantly associated  
497 with hue, explained 9% of the phenotypic variation, and increased hue by 11.99 degrees (Table 3). The  
498 marker *u\_gal\_3* (*u*) ( $p=0.901$ ) was not significant for hue (Table 3). However, the marker *u\_gal\_3* (*u*)  
499 ( $p=2.071e-05$ ) was significantly associated with chroma, explained 23% of the phenotypic variation, and  
500 decreased chroma by 10.67 units (Table 3). The markers An2-like\_exon2\_intron2 (*Aft*) ( $p=4.051e-04$  and  
501 Ant1\_1 (*Aft*) ( $p=9.009e-07$ ) were significantly associated with chroma, explained 14% and 27% of the total  
502 phenotypic variation, and decreased chroma by 10.80 and 12.23 units (Table 3). The marker *u\_gal\_3* (*u*) ( $p$   
503 =  $3.181e-04$ ) was significantly associated with L\*, explained 17 % of the phenotypic variation, and  
504 decreased L\* by 10.38 units (Table 3). The marker BetaRSA (*B*) was not significantly associated with hue  
505 ( $p=0.103$ ), chroma ( $p=0.842$ ), or L\* ( $p=0.715$ ) in the SG18-124 derived F<sub>2</sub> population (Table 3).

506

507 In the SG18-200 derived F<sub>2</sub> population, the markers *atv\_ex4* (*atv*) and *u\_gal\_3* (*u*) were monomorphic  
508 (Table 3). Therefore, we did not test the estimated effects of allele substitutions and associations in this  
509 population. The markers Ant1\_1 (*Aft*) ( $p=5.702e-04$ ) and An2-like\_exon2\_intron2 (*Aft*) ( $p=3.691e-05$ ) were  
510 significantly associated with hue (Table 3). The markers Ant1\_1 (*Aft*) and An2-like\_exon2\_intron2 (*Aft*)  
511 explained 17 and 23% of the phenotypic variation, and increased hue by 4.36 and 5.03 degrees (Table 3).  
512 Although the marker BetaRSA (*B*) was not significantly associated with hue in the SG18-124 derived F<sub>2</sub>  
513 population described above, it was significantly associated with the SG18-200 population ( $p=0.001$ ) (Table  
514 3). The marker BetaRSA (*B*) explained 14% of the total phenotypic variation and increased hue by 3.23  
515 degrees (Table 3). The markers Ant1\_1 (*Aft*) ( $p=1.475e-09$ ) and An2-like\_exon2\_intron2 (*Aft*) ( $p=7.13e-11$ )  
516 were significantly associated with chroma, explained 48% and 52% of the phenotypic variation, and  
517 decreased chroma by 9.04 and 9.15 units (Table 3). The marker BetaRSA (*B*) ( $p=0.06$ ) was marginally non-  
518 significant for chroma (Table 3). The markers Ant1\_1 (*Aft*) ( $p=7.042e-05$ ) and An2-like\_exon2\_intron2 (*Aft*)  
519 ( $p=2.296e-05$ ) were significantly associated with L\*, explained 24% and 25% of the total phenotypic  
520 variation, and decreased L\* by 6.15 and 5.75 units (Table 3).

521

522 We validated the interaction between homozygous *Aft* (*Aft/Aft*) and homozygous *atv* (*atv/atv*) in the F<sub>2</sub>  
523 progeny (Fig. 4B). Our results confirm an interaction between *Aft* and *atv* is needed for the deep purple  
524 fruit phenotype (Fig. 1C) and a single introgression of *Aft* confers purple pigmentation, designated as a  
525 light purple phenotype (Fig. 1B). Progeny homozygous for *Aft/Aft atv/atv* genotypes had higher hue values  
526 compared to all other marker-locus classes (Fig. 4B). Homozygous *Aft* (*Aft/Aft*) and heterozygous *atv*  
527 (*ATV/atv*) also had higher hue values than other marker locus classes, except for the *Aft/Aft atv/atv*  
528 genotype (Fig. 4B). These results suggested that the heterozygous *atv* genotype can accumulate enough  
529 anthocyanins to measure differences in hue. The *Aft/Aft ATV/ATV* and *AFT/Aft atv/atv* genotypes had  
530 higher degrees of hue than the *AFT/AFT ATV/ATV*, *AFT/AFT atv/atv*, *AFT/AFT*, *ATV/atv*, and *AFT/Aft*

530

531 *ATV/atv* genotypes (Fig. 4B). Still, they had significantly lower hue values than the *Aft/Aft atv/atv* and *Aft/Aft*  
532 *ATV/atv* genotypes (Fig. 4B).

533

#### 534 *Sequence analysis of candidate genes*

535

536 Sequence reads for *atv* covered 1353 bps (100%) from the first putative start codon. Sequence analysis  
537 suggested that the LA1141 *atv* may be nonfunctional compared to the cultivated accessions OH8245 and  
538 Heinz 1706. There is an 18 bp INDEL in the first intron of the LA1141 *atv* sequence and two G to A SNPs  
539 in the coding region of the second exon (Fig. 5). These G to A SNPs in the coding region may result in the  
540 loss of a functional R3/bHLH binding domain (Fig. 5). The LA1141 *atv* sequence is distinct from the allele  
541 previously described in Indigo Rose derived from *S. cheesmaniae* accession LA0434 and does not have  
542 the previously characterized 4 bp TAGA insertion (Fig. 5).

543

544 Contigs assembled from sequencing reads of the LA1141 and OH8245 of R2R3 MYB-encoding gene *An2-*  
545 *like* covered approximately 1,363 out of 1,356 base pairs (bps) from the putative start codon. FASTA files  
546 corresponding to sequences for tomato accessions used in this study are available at:  
547 <https://doi.org/10.5281/zenodo.5649546> for *An2-like* and <https://doi.org/10.5281/zenodo.5649996> for  
548 *Ant1* (Fenstermaker et al., 2021d, e). There were several unique SNPs and INDELS in the LA1141 *An2-like*  
549 sequence but none of them were in the conserved R2R3 domains (Fenstermaker et al., 2021d) However,  
550 LA1141 possess the previously characterized G to A SNP in the 5' splice site of the 2nd intron (Sun et al.,  
551 2020; Yan et al., 2020; Fenstermaker et al., 2021d). Sequencing reads covered 1182 out of 1012 of LA1141  
552 and 1012 out of 1012 bps of OH8245 from the first putative start codon in the R2R3 MYB-encoding gene  
553 *Ant1*. In the 3rd exon of the LA1141 *Ant1* sequence, there is 170 bp insertion/deletion (INDEL) which  
554 contained MYB core type 1 and type 2 cis-regulatory elements, an AC rich sequence type 2 cis-regulatory  
555 element (Fenstermaker et al., 2021e). Sequence analysis suggests that LA1141 may have a functional R2R3  
556 MYB activator at *Aft* and the R3 MYB repressor corresponding to *atv* is likely nonfunctional. Additional  
557 characterization of transcripts, proteins, and protein interactions are needed for *An2-like*, *Ant1* and *atv* for  
558 the confirmation of functional changes.

559

#### 560 *Phylogenetic analysis of Aft*

561

562 We combined the genomic sequences from LA1141, OH8245, and 84 re-sequenced accessions  
563 representative of the *Lycopersicon*, *Arcanum*, *Eriopersicon*, and *Neolycopersicon* groups. The red-fruited  
564 clade is represented by commercial, landrace, and heirloom tomato varieties, and *S. lycopersicum*  
565 *cerasiforme*. This clade also includes *S. pimpinellifolium* and the orange-fruited Galápagos species *S.*  
566 *cheesmaniae* and *S. galapagense*. The green-fruited clade is represented by *Solanum arcanum*, *S.*  
567 *chilense*, *S. chmielewskii*, *S. habrochaites*, *S. huaylasense*, *S. neorickii*, *S. pennellii*, and *S. peruvianum*.  
568 Genomic sequence corresponding to *Ant1* ranged from 1023 to 1993 bps and genomic sequences  
569 corresponding to *An2-like* ranged from 2292 to 2547 bps (Fenstermaker et al., 2021c). The differences in  
570 contig length correspond to insertions and deletions within the sequences as contigs matched at the 5'  
571 and 3' ends.

572

573 The maximum likelihood (ML) model phylogeny of the R2R3 MYBs representing *Aft* (Fenstermaker et al.,  
574 2021f) from 86 sequences were used to midpoint point root the tree and resolved major tomato clades  
575 within the MYB-encoding genes (Fig. 6). The ML model and clustering analysis of *Aft* sequence grouped  
576 accessions into their expected clades with 60.4% bootstrap support for the separation of red-fruited  
577 species and green-fruited species (Fig. 6). The purple fruited *S. chilense* accession LA1996, clusters with  
578 other members of the green fruited clade and close to a purple fruited *S. habrochaites* accession LA1777,  
579 with 44.7% bootstrap support (Fig. 6). Our purple accession *S. galapagense* accession LA1141 clusters  
580 with other members of endemic Galápagos tomatoes with 79.7% bootstrap support (Fig. 6). LA1141 does  
581 not cluster with members of the green-fruited clade based on sequence homology within the MYB-  
582 encoding genes underlying *Aft* (Fig. 6).

583

584 Additionally, we clustered the coding sequences (CDS) corresponding to the *Ant1* and *An2-like* MYB  
585 genes underlying *Aft* from LA1141, OH8245, and 84 re-sequenced accessions with outgroup sequences  
586 from *Arabidopsis thaliana*, *Salvia miltiorrhiza*, *S. tuberosom*, *S. lycopersicoides*, *C. annum*, *S. chilense*  
587 accession LA1996, *S. chilense* accession LA1930, and *S. lycopersicum* variety Indigo Rose (Fenstermaker  
588 et al., 2021g). The CDS corresponding to *Arabidopsis thaliana* MYB genes that were determined to be  
589 homologous to *Solanum Aft* sequence were used as an outgroup to root the tree (Fig. 7). The ML  
590 phylogeny separated *Ant1* and *An2-like* CDS with 98.4% bootstrap support (Fig. 7). *Arabidopsis thaliana*  
591 and *Salvia miltiorrhiza* clustered closer together compared to accessions of *Solanum* for both *Ant1* and  
592 *An2-like* (Fig. 7). These results are consistent with previously published asterid phylogeny (Zhang et al.,  
593 2020). Accessions of *C. annum* clustered further from *S. tuberosom* (Fig. 7), consistent with *Solanum*  
594 phylogeny (Särkinen et al., 2013). For *Ant1* CDS, accession LA1141 clustered with members of the red  
595 fruited clade with 81.3% bootstrap support. For *An2-like* CDS, accession LA1141 clustered with members  
596 of the red-fruited clade with 49.7% bootstrap support (Fig. 7).

597

## 598 Discussion

599

### 600 *Measuring tomato fruit pigmentation with quantitative methods*

601

602 Tomato color depends on the type and quantity of pigments synthesized in the fruits. Anthocyanins are  
603 responsible for the purple coloration of immature LA1141 fruit. Delphinidin-3-rutinoside and petunidin-3-  
604 (p-coumaroyl-rutinoside)-5-glucoside were the major anthocyanins identified. As fruit ripened, the  
605 predominant anthocyanin changed from petunidin 3-(coumaroyl)rutinoside-5-glucoside in the MG stage  
606 to malvidin 3(coumaroyl)rutinoside-5-glucoside in the breaker stage (Fig. 2). The chemical basis of  
607 pigmentation in progenies derived from LA1141 is consistent with those identified in introgression lines  
608 containing alleles from the green-fruited wild relatives (Jones et al., 2003). Phenotyping with quantitative  
609 measurements of color allowed us to distinguish classes of fruit that were useful for later genetic analysis.  
610 Cao et al., (2017) reported that it was difficult to distinguish marker-classes of *atv* with qualitative  
611 phenotyping, but we were able to detect differences in values of hue between homozygous and  
612 heterozygous genotypes (Fig. 4B). Additionally, our linkage analysis using quantitative measurements was  
613 able to distinguish classes and showed that *Aft* is necessary to recover light purple color in progenies (Fig.  
614 1B). However, two unlinked loci are needed to recover the deep purple phenotype found in IBL selection  
615 SG18-124 (Fig. 1C). Inheritance of purple pigmentation in the progenies derived from LA1141 is consistent  
616 with patterns inherited from wild relatives in the green-fruited clade.

617

### 618 *Three putative QTL affect LA1141 fruit color*

619

620 Color was associated with QTLs on chromosomes 7 and 10, and candidate genes were identified. The  
621 MYB-encoding gene family underlying the *Aft* locus maps to the distal arm of chromosome 10 and was  
622 associated with higher hue values. Two QTLs, one on the proximal arm and one on the distal arm of  
623 chromosome 10, were associated with chroma. The *Golden 2-like* transcription factor underlying  
624 the *uniform ripening (u)* locus maps to the proximal arm and mediated the brightness or dullness of the  
625 color. Accession LA1141 has a functional *Golden 2-like* allele underlying the *u* locus. The *u* locus is  
626 responsible for increasing chromoplast number, chlorophyll accumulation, and changing chromoplast  
627 distribution (Powell et al., 2012). This chlorophyll accumulation causes immature fruit to have patches of  
628 darker green color, especially where fruit are attached to the pedicel (Fig. 1D). Sequence analysis of MYB-  
629 encoding genes underlying the *Aft* locus suggested that LA1141 may have a functional R2R3 MYB  
630 activator which could explain its purple pigmentation in early stages of fruit development, as measured by  
631 hue, chroma, and L\*. An allele of *atv* on chromosome 7 was detected based on interactions with *Aft* that  
632 increased pigmentation measured as hue (Fig. 4A). The QTLs and the interaction between chromosomes  
633 7 and 10 were also validated in the subsequent IBL derived F<sub>2</sub> generations (Fig. 4B).

634

635 Two QTLs were associated with L\*, one on chromosome 6 and one on the proximal arm of chromosome  
636 10. Only the QTL on chromosome 10 was validated in subsequent generations (Table 3). The region on  
637 chromosome 10 mapped to *u*. The *u* locus is likely affecting measurements of fruit darkness for similar



638 reasons mentioned above. We expected the QTL on chromosome 6 to be associated with the *Beta* (*B*)  
639 locus. However, mapping *B* failed to support this locus as a candidate (Table 2). We were unable to identify  
640 a candidate for the QTL on chromosome 6 corresponding to  $L^*$  in the IBC population. However, the QTL  
641 on chromosome 6 only explained 10% of the phenotypic variance compared to 35% of the variance  
642 explained by *u* (Table 2). Additionally, when we mapped *B* in the subsequent  $F_2$  populations we could  
643 detect association in only 1 of the populations (Table 3). In the SG18-200 derived  $F_2$  population, *B* was  
644 associated with hue, but not with chroma or  $L^*$  (Table 3). We believe that our ability to detect *B* in this  
645 population is attributed to the monomorphic alleles for *atv* and *u* reducing the range of hue (Table 3).

646

647 *The primary regulatory mechanism for anthocyanin accumulation is conserved in LA1141*

648

649 The interaction between chromosome 7 (*atv*) and chromosome 10 (*Aft*) in the LA1141 × OH8245 IBC  
650 population results in deep purple fruit (Fig. 1C). This interaction suggests that the role of synergistic MYB  
651 regulatory genes underlying loci on 7 and 10 is conserved between LA1141 and the green-fruited species.  
652 A complex of interacting MYB transcription factors, basic helix-loop-helix transcription factors (bHLH),  
653 and WD40 repeat domains (WDR), known as the MYB-bHLH-WDR (MBW) modulates anthocyanin  
654 accumulation in plants (Colanero et al., 2020b). The R2R3 MYB activators compete with the R3 MYB  
655 repressors for interaction with the bHLH transcription factor in the MBW complex (Colanero et al., 2020b).  
656 A CRISPR/Cas9 mediated silencing of MYB genes underlying the *Aft* locus suggested that only *An2-like* is  
657 needed for purple pigmentation in the peel of the tomato variety Indigo Rose (Yan et al., 2020). The same  
658 study showed that restoring function of *atv* in Indigo Rose reverts the coloration back to the light purple  
659 phenotype that we observed in SG18-200 (Fig. 1B) (Yan et al., 2020). Additionally, *atv* sequence targeted  
660 using CRISPR in the coding region of the second exon, where we observed the G to A SNP in LA1141,  
661 resulted in a loss of function of the R3/bHLH binding domain in LA1996 (Yan et al., 2020). This targeted  
662 mutation caused a purple phenotype that was similar to what we observed in our deep purple accession  
663 (Fig. 1C).

664

665 *Aft in LA1141 is likely a gain of function resulting from convergent or parallel mechanism*

666 Pigmentation in the tomato clade of *Solanum* is considered a phylogenetic signal with the expression of  
667 carotenoids and anthocyanins separating the green fruited and red fruited clades (Gonzali and Perata,  
668 2021). It is interesting to speculate about how LA1141 acquired its purple fruit pigmentation and how  
669 selection forces might maintain this pigmentation. One plausible explanation for selection and  
670 maintenance of pigmentation may be related to the role of fruit pigmentation in enticing organisms that  
671 disperse seed (Grotewold, 2006). AS an example, orange fruit are postulated to have a selective advantage  
672 on the Galápagos Islands as the result seed disperser color preferences (Gibson et al., 2021). An  
673 investigation of known seed disperser preferences on the Galápagos islands and LA1141 fruit could  
674 elucidate a possible evolutionary mechanism, but more exploration is required. The duplication of MYB  
675 transcription factors in flowering plants in general and the locus of linked family members on chromosome  
676 10 specifically provides opportunities for selection (Pickersgill, 2018).

677 In the red-fruited clade the structure of *Aft* phylogeny places *S. galapagense* accessions closer to *S.*  
678 *pimpinellifolium* and other red cultivated tomatoes, which is consistent with previously published *Solanum*  
679 phylogeny (Grandillo et al., 2011). We can separate the members of the red-fruited clade in the  
680 *Lycopersicon* group from *Arcanum*, *Eriopersicon*, and *Neolycopersicon* groups in the green-fruited clade,  
681 but our phylogeny lacks the resolution to separate the green-fruited species within those groups (Fig. 6;  
682 Fig. 7). These results are also consistent with other studies (Peralta et al., 2008, The 100 Tomato Genome  
683 Sequencing Consortium). Additionally, results from the outgroup rooted tree using CDS from distantly  
684 related species suggests that the green-fruited clade is ancestral. Anthocyanin-mediated purple fruit  
685 appears to have been lost in the red-fruited clade. The gain of function at *Aft* in LA1141 has its origin in  
686 the red-fruited clade and is not likely an ancient introgression from a green-fruited progenitor.

687 *Conclusion*

688

689 We identified an accession of *S. galapagense* that has purple pigmentation in the fruit. Anthocyanins are  
690 responsible for this color. Genes underlying the *atv*, *Aft*, and *u* loci are implicated as candidates for major  
691 QTL. The loci *atv* and *Aft* interact suggesting the same mechanism producing anthocyanins in the green-  
692 fruited clade is responsible for pigment patterns in LA1141 fruit. *Aft* is known from wild accessions in the  
693 green-fruited clade and we probed Rick's hypothesis about an ancient hybridization event between  
694 progenitors of *S. galapagense* using genomic sequence from the *Aft* locus. Our phylogenetic analysis  
695 concluded that a functional allele of *Aft* in LA1141 is likely the result of convergent or parallel mechanisms  
696 and is not derived from introgression from a green-fruited relative. Our findings guide us toward a better  
697 understanding purple color found in the endemic Galápagos tomatoes and provide additional resources  
698 for characterizing anthocyanin biosynthesis in wild tomato relatives.

699

## 700 Acknowledgements

701

702 We thank Jihuen Cho and the farm crews from the Ohio Agricultural Research and Development Center  
703 (OARDC) Wooster for assistance with management of the research. We thank Marcela Carvalho  
704 Andrade, Regis de Castro Carvalho, and Wilson Roberto Maluf from The Federal University of Lavras,  
705 37200-000 Lavras, Brazil for assistance with the LA1141 IBC population. Salaries and research support  
706 were provided by state and federal funds appropriated to The Ohio State University, OARDC, Hatch  
707 project OHO01405, and grant funds from USDA Specialty Crops Research Initiative Award number  
708 2016-51181-25404.

709

## 710 Figures

711

712 **Fig. 1** Heritable fruit pigmentation from *S. galapagense* accession LA1141. We determined a role for  
713 several candidate genes underlying the *Anthocyanin fruit* (*Aft*), *atropviolacea* (*atv*), and *uniform* ripening (*u*)  
714 loci derived from. Homozygous LA1141 *Aft* is designated as *Aft/Aft*, homozygous LA1141 *atv* is designated  
715 as *atv/atv*, and homozygous LA1141 *u* is designated as *U/U*. Notation follows previous publications Cao  
716 et al., 2017. **A.** LA1141 mature green fruit (*Aft/Aft*; *atv/atv*; *U/U*) **B.** Inbred backcross line (IBL) SG18-200  
717 (*Aft/Aft*; *ATV/ATV*; *u/u*) **C.** IBL SG18-124 (*Aft/Aft*; *atv/atv*; *U/U*) **D.** IBL SG18-251 (*AFT/AFT*; *ATV/ATV*; *U/U*).

718

719 **Fig. 2.** Predominant pigments in the fruit of LA1141 derived lines. The chromatograms show ultra-high  
720 performance liquid chromatography separation and photo diode array (UHPLC-PDA) absorbance at 520  
721 nm for fruit from mature green, breaker, and ripe fruit. The predominant peaks were identified as  
722 anthocyanins and are labeled above.

723

724 **Fig. 3.** Composite interval mapping (CIM) of fruit color measured as hue (violet), chroma (pink), and  $L^*$   
725 (green, dotted) in the LA1141 x OH8245 BC<sub>2</sub>S<sub>3</sub> inbred backcross population. The y-axis is the logarithm  
726 of the odds (LOD). The horizontal lines are the resampled LOD significance cutoff ( $\alpha=0.05$ ,  $N=1000$   
727 permutations) for hue (violet), chroma (pink) and  $L^*$  (green, dotted). The x-axis represents the 12  
728 chromosomes in tomato and chromosome distance in cM was calculated using the Kosambi function to  
729 correct for multiple crossovers.

730

731 **Fig. 4.** Box plots represent interactions between the *Anthocyanin fruit* and *atropviolacium* loci. The x-axis  
732 is marker-locus genotypic class, and the y-axis is degrees of hue. **(A)** The interaction is shown in the  
733 BC<sub>2</sub>S<sub>3</sub> population and **(B)** the combined F<sub>2</sub> validation populations. For the *Anthocyanin fruit* locus:  
734 homozygous LA1141 alleles are abbreviated as *Aft/Aft*, heterozygous alleles as *AFT/aft*, and homozygous  
735 OH8245 *AFT/AFT*. For the *atropviolacium* locus: homozygous LA1141 alleles are abbreviated as *atv/atv*,  
736 heterozygous alleles as *ATV/atv*, and homozygous OH8245 *ATV/ATV*. Different letters indicate statistically  
737 significant differences among groups (Tukey's Honest Significant Difference (HSD),  $P<0.05$ ). Marker-locus  
738 genotypic class notation follows previous publications (Cao et al. 2017).

739

740 **Fig. 5.** Sequence polymorphism of selected genomic sequence regions of the *atv* locus. A novel 18 bp  
741 insertion/deletion (INDEL) found in the first intron in LA1141, the causal 4 bp INDEL (*slmybatv*) previously  
742 characterized in the tomato cultivar Indigo Rose (Cao et al., 2017), and two G to A SNPs in the coding  
743 region of the 2<sup>nd</sup> exon (**boxed**) are labeled above (**arrow, bold**). Sequences were aligned using MUSCLE  
744 (Edgar, 2004) using default settings. Conserved nucleotides are starred. The Heinz reference sequence  
745 (Heinz1706), OH8245, LA1141 and Indigo Rose genomic *atv* sequences are represented.  
746

747 **Fig. 6** Midpoint rooted phylogenetic tree for MYB transcription factors underlying the *Aft* locus. The tree  
748 represents clustering of genomic sequences underlying *Aft* 84 unique tomato accessions from the 100  
749 Tomato genome sequencing consortium, LA1996 (purple), OH8245 and LA1141 (purple) are clustered. A  
750 maximum likelihood midpoint rooted tree was constructed in the phangorn R package using the G.T.R  
751 model. Data resampling using 1000 rapid bootstrap replications was performed using the bootstrap.pml  
752 function and bootstrap values are given for each branch. There are 47 identical *S. lycopersicum*  
753 sequences are condensed under the name “Cultivated tomato *Aft* (47 accessions) (**red triangle**).  
754

755 **Fig. 7** Outgroup rooted phylogenetic tree for MYB transcription factors underlying *Ant1* and *An2-like*  
756 coding sequence (CDS) at the *Aft* locus. *Arabidopsis thaliana*, *Salvia miltiorrhiza*, *S. tuberosa* Phureja,  
757 *C. annuum*, *S. lycopersicum* variety Indigo Rose [MN433087 (Yan et al., 2020)], *S. chilense* accession  
758 LA1996 [MN242011.1, EF433417.1 (Sapir et al., 2008; Colanero et al., 2020a)], *S. chilense* (Dunal) Reiche  
759 (formerly *Lycopersicon chilense* Dunal) accession LA1930 [MN242012.1 (Colanero et al., 2020a)], 84  
760 tomato accessions published as part of The 100 Tomato Genome Sequencing Consortium (The 100  
761 Tomato Genome Sequencing Consortium, et al., 2014), *S. lycopersicum* variety OH8245, and *S.*  
762 *galapagense* accession LA1141 are clustered. Identical *S. lycopersicum* sequences are condensed (**red**  
763 **triangles**). A maximum likelihood tree was constructed in the phangorn R package (Schliep, 2011) using  
764 the G.T.R model. Data resampling using 1000 rapid bootstrap replications was performed using the  
765 bootstrap.pml function and bootstrap values are given for each branch. Trees were rooted at *Arabidopsis*  
766 *thaliana* MYB-encoding genes as the outgroup.  
767

768 **Tables**

769

770 **Table 1.** Genetic map quality for the inbred backcross population (LA1141 × OH8245 BC<sub>2</sub>S<sub>3</sub>).

771

772 **Table 2.** Markers associated with tomato fruit color.

773

774 **Table 3.** Candidate gene associations validated in subsequent F<sub>2</sub> populations.

775

776 **Author contributions**

777

778 SF and DF: conceptualization, SF: phenotyping, JC: chemical analyses, SF: linkage map construction,  
779 SF: QTL mapping, SF and LS: marker development and sequencing, SF: bioinformatics and sequence  
780 analysis, SF: phylogenetic analysis, SF: writing, and DF: contribution to writing

781

782 **Conflicts of interest**

783

784 The authors have no conflict of interests to declare

785

786 **Funding**

787

788 Salaries and research support were provided by state and federal funds appropriated to The Ohio State  
789 University, Ohio Agricultural Research and Development Center (OARDC), Hatch project OHO01405,  
790 and grant funds from USDA Specialty Crops Research Initiative Award number 2016-51181-25404. The  
791 Cooperstone lab was supported by Foods for Health, a focus area of the Discovery Themes Initiative at  
792 The Ohio State University and The Lisa and Dan Wampler Endowed Fellowship for Foods.

793

794 **Data availability**

795

796 All data supporting the findings of this study are available within the paper. Additionally, pertinent  
797 supplementary tables and FASTA files are available in Zenodo at:

798

799 **Fenstemaker S, Sim L, Cooperstone J, Francis D.** 2021a. Summary of PCR based markers used in  
800 this study (Version 1) [Data set]. Zenodo. <https://doi.org/10.5281/zenodo.5650150>

801

802 **Fenstemaker S, Sim L, Cooperstone J, Francis D.** 2021b. LA1141 × OH8245 inbred backcross (IBC)  
803 single nucleotide polymorphism (SNP) markers for genetic studies (Version 1) [Data set]. Zenodo.  
804 <https://doi.org/10.5281/zenodo.5650152>

805

806 **Fenstemaker S, Sim L, Cooperstone J, Francis D.** 2021c. Accession passport and sequence data  
807 (Version 1) [Data set]. Zenodo. <https://doi.org/10.5281/zenodo.5650141>

808

809 **Fenstemaker S, Sim L, Cooperstone J, Francis D.** 2021d. FASTA file containing the MYB encoding  
810 gene An2-like genomic sequences corresponding to wild and cultivated tomato accessions (Version 1)  
811 [Data set]. Zenodo. <https://doi.org/10.5281/zenodo.5649546>

812

813 **Fenstemaker S, Sim L, Cooperstone J, Francis D.** 2021e. FASTA file containing to the MYB encoding  
814 gene Ant1 genomic sequences corresponding to wild and cultivated tomato accessions (Version 1) [Data  
815 set]. Zenodo. <https://doi.org/10.5281/zenodo.5649996>

816

817 **Fenstemaker S, Sim L, Cooperstone J, Francis D.** 2021f. FASTA file containing the MYB encoding  
818 genes at the Aft locus with genomic sequences corresponding to wild and cultivated tomato accessions  
819 (Version 1) [Data set]. Zenodo. <https://doi.org/10.5281/zenodo.5650058>

820



821 **Fenstemaker S, Sim L, Cooperstone J, Francis D.** 2021g. FASTA file containing the MYB encoding  
822 gene An2-like and Ant1 coding sequences corresponding to wild and cultivated tomato accessions  
823 (Version 1) [Data set]. Zenodo. <https://doi.org/10.5281/zenodo.5650072>

## References

- Altschul S F, Gish W, Miller W, Myers EW, Lipman DJ.** 1990. Basic local alignment search tool. *Journal of molecular biology* **215**, 403-410.
- Berardini T Z, Reiser L, Li D, Mezheritsky Y, Muller R, Strait E, Huala E.** 2015. The Arabidopsis information resource: making and mining the “gold standard” annotated reference plant genome. *Genesis* **53**, 474-485
- Bernal E, Liabeuf D, Francis DM.** 2020. Evaluating quantitative trait locus resistance in tomato to multiple *Xanthomonas spp.* *Plant Disease* **104**, 423-429.
- Berry SZ, Gould WA, Wiese KL.** 2019. ‘Ohio 8245’ Processing Tomato. *HortScience* **26**, 1093.
- Broman KW, Wu H, Sen S, Churchill GA.** 2003. R/qtl: QTL mapping in experimental crosses. *Bioinformatics* **19**, 889-890. <https://rqt.org/>
- Cao X, Qiu Z, Wang X, et al.** 2017. A putative R3 MYB repressor is the candidate gene underlying *atrovioiacium*, a locus for anthocyanin pigmentation in tomato fruit. *Journal of Experimental Botany* **68**, 5745-5758.
- Center O S.** 1987. Ohio supercomputer center. <https://www.osc.edu/sites/osc.edu/files/documentation/osc-overview-au15.pdf>
- Chaves-Silva S, Dos Santos AL, Chalfun-Júnior A, Zhao J, Peres LE, Benedito VA.** 2018. Understanding the genetic regulation of anthocyanin biosynthesis in plants—tools for breeding purple varieties of fruits and vegetables. *Phytochemistry* **153**, 11-27.
- Churchill GA, Doerge RW.** 1994. Empirical threshold values for quantitative trait mapping. *Genetics* **138**, 963-971.
- Colanero S, Perata P, Gonzali S.** 2018. The *atroviolacea* gene encodes an R3-MYB protein repressing anthocyanin synthesis in tomato plants. *Frontiers in Plant Science* **9**, 1-17.
- Colanero S, Tagliani A, Perata P, Gonzali S.** 2020a. Alternative splicing in the anthocyanin fruit gene encoding an R2R3 MYB transcription factor affects anthocyanin biosynthesis in tomato fruits. *Plant communications*, **1**, 100006.
- Colanero S, Perata P, Gonzali S.** 2020b. What’s behind purple tomatoes? Insight into the mechanisms of anthocyanin synthesis in tomato fruits. *Plant Physiology* **182**, 1841-1853.
- Cominelli E, Gusmaroli G, Allegra D, Galbiati M, Wade HK, Jenkins GI, Tonelli C.** 2008. Expression analysis of anthocyanin regulatory genes in response to different light qualities in *Arabidopsis thaliana*. *Journal of plant physiology* **165**, 886-894.
- Commission Internationale de L’ Eclairage.** 1978. Recommendations on Uniform Colour Spaces. Color-Difference Equations, Psychometric Color Terms, 1-21.
- Dal Cin V, Kevany B, Fei, Z, Klee, HJ.** 2009. Identification of *Solanum habrochaites* loci that quantitatively influence tomato fruit ripening-associated ethylene emissions. *Theoretical and applied genetics*, **119**, 1183-1192.

**Darrigues A, Hall J, Van Der Knaap E, Francis DM, Dujmovic N, Gray S.** 2008. Tomato analyzer-color test: A new tool for efficient digital phenotyping. *Journal of the American Society for Horticultural Science* **133**, 579–586.

**Darwin SC, Knapp S, Peralta, IE.** 2003. Taxonomy of tomatoes in the Galápagos Islands: native and introduced species of *Solanum* section *Lycopersicon* (Solanaceae). *Systematics and Biodiversity* **1**, 29–53.

**De Jong WS, Eannetta NT, De Jong DM, Bodis, M.** 2004. Candidate gene analysis of anthocyanin pigmentation loci in the Solanaceae. *Theoretical and Applied Genetics* **108**, 423–432.

**De Mendiburu F.** 2017. Package ‘Agricolae’: Statistical Procedures for Agricultural Research, R Package Version 1.2–4. <https://CRAN.R-project.org/package=agricolae>

**Edgar RC.** 2004. MUSCLE: Multiple sequence alignment with high accuracy and high throughput. *Nucleic Acids Research* **32**, 1792–1797.

**Fenstemaker S, Sim L, Cooperstone J, Francis D.** 2021a. Summary of PCR based markers used in this study (Version 1) [Data set]. Zenodo. <https://doi.org/10.5281/zenodo.5650150>

**Fenstemaker S, Sim L, Cooperstone J, Francis D.** 2021b. LA1141 × OH8245 inbred backcross (IBC) single nucleotide polymorphism (SNP) markers for genetic studies (Version 1) [Data set]. Zenodo. <https://doi.org/10.5281/zenodo.5650152>

**Fenstemaker S, Sim L, Cooperstone J, Francis D.** 2021c. Accession passport and sequence data (Version 1) [Data set]. Zenodo. <https://doi.org/10.5281/zenodo.5650141>

**Fenstemaker S, Sim L, Cooperstone J, Francis D.** 2021d. FASTA file containing the MYB encoding gene An2-like genomic sequences corresponding to wild and cultivated tomato accessions (Version 1) [Data set]. Zenodo. <https://doi.org/10.5281/zenodo.5649546>

**Fenstemaker S, Sim L, Cooperstone J, Francis D.** 2021e. FASTA file containing to the MYB encoding gene Ant1 genomic sequences corresponding to wild and cultivated tomato accessions (Version 1) [Data set]. Zenodo. <https://doi.org/10.5281/zenodo.5649996>

**Fenstemaker S, Sim L, Cooperstone J, Francis D.** 2021f. FASTA file containing the MYB encoding genes at the Aft locus with genomic sequences corresponding to wild and cultivated tomato accessions (Version 1) [Data set]. Zenodo. <https://doi.org/10.5281/zenodo.5650058>

**Fenstemaker S, Sim L, Cooperstone J, Francis D.** 2021g. FASTA file containing the MYB encoding gene An2-like and Ant1 coding sequences corresponding to wild and cultivated tomato accessions (Version 1) [Data set]. Zenodo. <https://doi.org/10.5281/zenodo.5650072>

**Georgiev C.** 1972. *Anthocyanin fruit (Af)*. Tomato Genetics Cooperative Report **22**, 10.

**Gibson MJS, Torres M de L, Brandvain Y, Moyle LC.** 2021. Introgression shapes fruit color convergence in invasive galápagos tomato. eLife DOI: 10.7554/eLife.64165

**Gnu P.** 2007. Free Software Foundation. Bash (3. 2. 48) [Unix shell program].

**Gonzali S, Perata P.** 2021. Fruit Colour and Novel Mechanisms of Genetic Regulation of Pigment Production in Tomato Fruits. Horticulturae **7**, 259.

**Grandillo S, Chetelat R, Knapp S, Spooner D, Peralta I, Cammareri M, Perez O, Termolino P, Tripodi P, Chiusano ML, Ercolano MR.** 2011 Solanum sect. Lycopersicon. Wild crop relatives: Genomic and breeding resources. 129-215.

**Grotewold E.** 2006. The genetics and biochemistry of floral pigments. Annu. Rev. Plant Biol. **57**, 761-780.

**Haley CS, Knott SA.** 1992. A simple regression method for mapping quantitative trait loci in line crosses using flanking markers. Heredity, **69**, 315-324.

**Hosmani PS, Flores-Gonzalez M, van de Geest H, et al.** 2019. An improved de novo assembly and annotation of the tomato reference genome using single-molecule sequencing, Hi-C proximity ligation and optical maps. bioRxiv doi: <https://doi.org/10.1101/767764>

**Hulse-Kemp AM, Maheshwari S, Stoffel K, et al.** 2018. Reference quality assembly of the 3.5-Gb genome of Capsicum annuum from a single linked-read library. Horticulture research **5**, 1-13.

**Jones CM, Mes P, Myers JR.** 2003. Characterization and Inheritance of the *Anthocyanin fruit (Aft)* Tomato. Journal of Heredity **94**, 449-456.

**Joubert TLG.** 1962. A new jointless gene, j-2<sup>th</sup>. Tomato Genetics Cooperative. **12**, 29-30.

**Kabelka E, Yang W, Francis DM.** 2004. Improved Tomato Fruit Color within an Inbred Backcross Line Derived from *Lycopersicon esculentum* and *L. hirsutum* Involves the Interaction of Loci. Journal of the American Society for Horticultural Science **129**, 250-257.

**Kiferle C, Fantini E, Bassolino L, et al.** 2015. Tomato R2R3-MYB proteins SIANT1 and SIAN2: Same protein activity, different roles. PLoS ONE **10**, 1-20.

**Kosambi DD.** 1944 The estimation of the map distance from recombination values. Annals of Eugenics. **12**, 172-175.

**Letunic I, Bork, P.** 2021. Interactive Tree Of Life (iTOL) v5: an online tool for phylogenetic tree display and annotation. Nucleic acids research **49**, 293-296. <https://itol.embl.de/>

**Li C, Lu S.** 2014. Genome-wide characterization and comparative analysis of R2R3-MYB transcription factors shows the complexity of MYB-associated regulatory networks in *Salvia miltiorrhiza*. BMC genomics **15**, 1-12.

**Lincoln R, Porter JW.** 1950. Inheritance of beta-carotene in tomatoes. Genetics **35**, 206-211.



**Mathews H, Clendennen SK, Caldwell CG, et al.** 2003. Activation tagging in tomato identifies a transcriptional regulator of anthocyanin biosynthesis, modification, and transport. *Plant Cell* **15**, 1689–1703.

**Mes PJ, Boches P, Myers JR, Durst R.** 2008. Characterization of tomatoes expressing anthocyanin in the fruit. *Journal of the American Society for Horticultural Science* **133**, 262–269.

**Muller CH.** 1940. A revision of the genus *Lycopersicon*. US Department of Agriculture 382.

**Nguyen LT, Schmidt HA, Von Haeseler A, Minh BQ.** 2015. IQ-TREE: A fast and effective stochastic algorithm for estimating maximum-likelihood phylogenies. *Molecular Biology and Evolution* **32**, 268–274.

**Okonechnikov K, Golosova O, Fursov M, et al.** 2012. Unipro UGENE: A unified bioinformatics toolkit. *Bioinformatics* **28**, 1166–1167.

**Ooe E, Ogawa K, Horiuchi T, Tada H, Murase H, Tsuruma K, Shimazawa M, Hara H.** 2016. Analysis and characterization of anthocyanins and carotenoids in Japanese blue tomato. *Bioscience, Biotechnology and Biochemistry* **80**, 341–349.

**Orchard CJ.** 2014. Naturally occurring variation in the promoter of the chromoplast-specific *Cyc-B* gene in tomato can be used to modulate levels of  $\beta$ -carotene in ripe tomato fruit. Master's thesis, The Ohio State University. [http://rave.ohiolink.edu/etdc/view?acc\\_num=osu1416926782](http://rave.ohiolink.edu/etdc/view?acc_num=osu1416926782). Accessed September 2021

**Orchard CJ, Cooperstone JL, Gas-Pascual E, Andrade MC, Abud G, Schwartz SJ, Francis DM.** 2021. Identification and assessment of alleles in the promoter of the *Cyc-B* gene that modulate levels of  $\beta$ -carotene in ripe tomato fruit. *Plant Genome* **14**, 1–17.

**Peralta I E., Spooner DM, Knapp S.** 2008. Taxonomy of wild tomatoes and their relatives (*Solanum* sect. *Lycopersicoides*, sect. *Juglandifolia*, sect. *Lycopersicon*; Solanaceae). *Systematic botany monographs*, **84**.

**PGS Consortium.** 2011. Genome sequence and analysis of the tuber crop potato. *Nature*, **475**,189-195.

**Pickersgill B.** 2018. Parallel vs. Convergent evolution in domestication and diversification of crops in the Americas. *Frontiers in Ecology and Evolution* **6**, 1–15.

**Povero G, Gonzali S, Bassolino L, Mazzucato A, Perata P.** 2011. Transcriptional analysis in high-anthocyanin tomatoes reveals synergistic effect of *Aft* and *atv* genes. *Journal of Plant Physiology* **168**, 270–279.

**Powell AF, Courtney LE., Schmidt MHW, et al.** 2020. A *Solanum lycopersicoides* reference genome facilitates biological discovery in tomato. *BiorXiv*. doi: <https://doi.org/10.1101/2020.04.16.039636>

**Powell A, Nguyen GV, Hill TT, et al.** 2012. *Uniform ripening* encodes a *Golden 2-like* transcription factor regulating tomato fruit chloroplast development *Science* **336**, 1711-1715.

**Qiu Z, Wang H, Li D, Yu B, Hui Q, Yan S, Huang Z, Cui X, Cao B.** 2019. Identification of Candidate HY5-Dependent and -Independent Regulators of Anthocyanin Biosynthesis in Tomato. *Plant and Cell Physiology* **60**, 643–656.

**R Core Team.** 2020. R: a language and environment for statistical computing. Vienna, Austria: R Foundation for statistical Computing. <https://www.R-project.org>

**Rick CM.** 1956. Genetic and systematic studies on accessions of *Lycopersicon* from the Galapagos Islands. *American Journal of Botany* **1**, 687-696.

**Rick CM.** 1961. Biosystematic studies on Galápagos Tomatoes'. Occasional papers of the California Academy of Sciences **44**, 59-77.

**Rick CM.** 1967. Fruit and pedicel characters derived from Galápagos Tomatoes'. *Economic Botany* **21**, 171-184.

**Rick CM., Cisneros P, Chetelat, RT, DeVerna, JW 1994.** Abg—a gene on chromosome 10 for purple fruit derived from *S. lycopersicoides*. *Rep. Tomato Genet. Coop* **44**, 29-30.

**Sapir M, Oren-Shamir M, Ovadia R, Reuveni M, Evenor D, Tadmor Y, Nahon S, Shlomo H, Chen L, Meir A, Levin I.** 2008. Molecular aspects of Anthocyanin fruit tomato in relation to high pigment-1. *Journal of Heredity*, **99**, 292-303.

**Särkinen T, Bohs L, Olmstead RG, Knapp S. 2013.** A phylogenetic framework for evolutionary study of the nightshades (Solanaceae): a dated 1000-tip tree. *BMC evolutionary biology* **13** 1-15.

**Schliep KP.** 2011. phangorn: Phylogenetic analysis in R. *Bioinformatics* **27**, 592-593. <https://cran.r-project.org/web/packages/phangorn/phangorn.pdf>

**Schreiber G, Reuveni M, Evenor D, et al.** 2012. ANTHOCYANIN1 from *Solanum chilense* is more efficient in accumulating anthocyanin metabolites than its *Solanum lycopersicum* counterpart in association with the ANTHOCYANIN FRUIT phenotype of tomato. *Theoretical and Applied Genetics* **124**, 295-307.

**Shannon LM, Yandell BS, Broman K.** 2013. Users guide for new BCsFt tools for R/ql. <http://cran.fhcr.org/web/packages/ql/vignettes/bcsft.pdf>

**Sim SC, Durstewitz G, Plieske J, et al.** 2012. Development of a large SNP genotyping array and generation of high-density genetic maps in tomato. *PLoS ONE* doi.org/10.1371/journal.pone.0040563

**Sim SC, Robbins MD, Wijeratne S, Wang H, Yang W, Francis DM.** 2015. Association analysis for bacterial spot resistance in a directionally selected complex breeding population of tomato. *Phytopathology* **105**, 1437-1445.

**Stajich JE, Block D, Boulez K, et al.** 2002. The Bioperl Toolkit: Perl Modules for the Life Sciences. PMC free article, 1611-1618

**Stommel J.** 2001. USDA 97L63, 97L66, and 97L97: Tomato breeding lines with high fruit beta-carotene content. *Journal of the American Society for Horticultural Science* **36**, 387-388.

**Sun C, Deng L, Du M, Zhao J, Chen Q, Huang T, Jiang H, Li CB, Li C.** 2020. A Transcriptional Network Promotes Anthocyanin Biosynthesis in Tomato Flesh. *Molecular Plant* **13**, 42-58.

**Teng S, Keurentjes J, Bentsink L, Koornneef M, Smeekens S.** 2005. Sucrose-specific induction of anthocyanin biosynthesis in Arabidopsis requires the MYB75/PAP1 gene. *Plant physiology* **139**, 1840-1852.

**The 100 Tomato Genome Sequencing Consortium.** 2014. Exploring genetic variation in the tomato (*Solanum* section *Lycopersicon*) clade by whole-genome sequencing. *Plant Journal* **80**, 136-148.

**Timberlake C F, Bridle, P. 1982.** Distribution of anthocyanins in food plants **125**. Academic Press, New York.

**Tomes ML, Quackenbush FW, McQuistan M.** 1954. Modification and dominance of the gene governing formation of high concentrations of beta-carotene in the tomato. *Genetics*, **39**, 810–817.

**Untergasser A, Cutcutache I, Koressaar T, Ye J, Faircloth BC, Remm M, Rozen SG.** 2012. Primer3-new capabilities and interfaces. *Nucleic Acids Research* **40**, 1–12.

**Yan S, Chen N, Huang Z, Li D, Zhi J, Yu B, Liu X, Cao B, Qiu Z.** 2020. Anthocyanin Fruit encodes an R2R3-MYB transcription factor, SIAN2-like, activating the transcription of SIMYBATV to fine-tune anthocyanin content in tomato fruit. *New Phytologist* **225**, 2048–2063.

**Zeng ZB.** 1994. A composite interval mapping method for locating multiple QTLs. In Proceedings, 5th World Congress on Genetics Applied to Livestock Production, University of Guelph, Guelph, Ontario, Canada **7**

**Zhang C, Zhang T, Luebert F, et al.** 2020. Asterid phylogenomics/phylotranscriptomics uncover morphological evolutionary histories and support phylogenetic placement for numerous whole-genome duplications. *Molecular biology and evolution* **37**, 3188–3210.

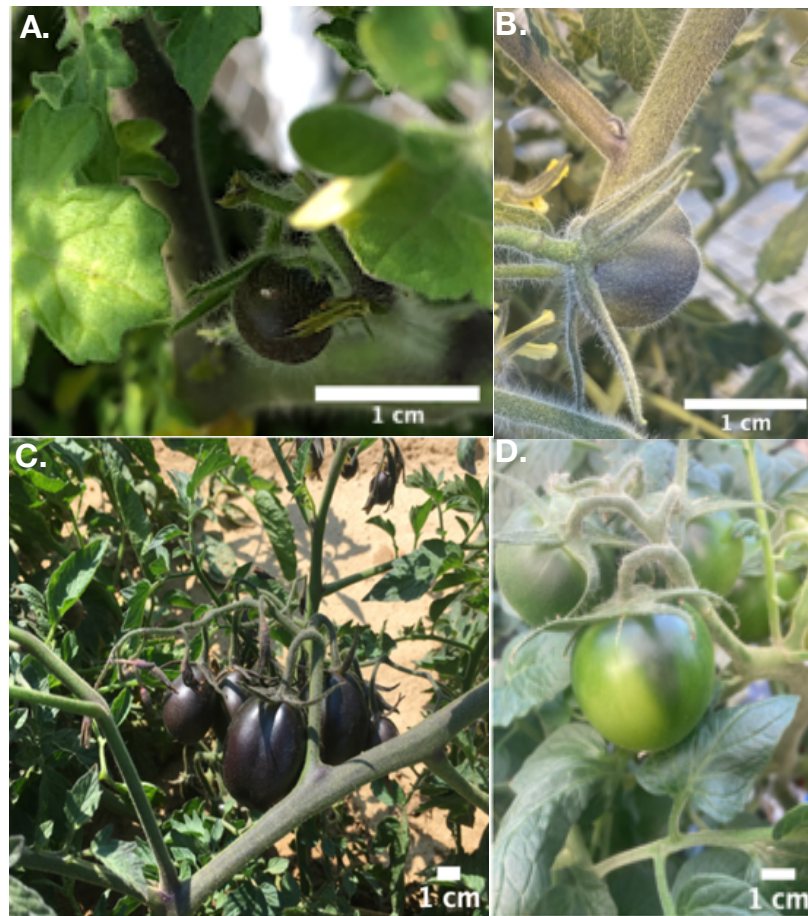

**Fig. 1** Heritable fruit pigmentation from *S. galapagense* accession LA1141. We determined a role for several candidate genes underlying the *Anthocyanin fruit* (*Aft*), *atroviolacea* (*atv*), and *uniform ripening* (*u*) loci derived from. Homozygous LA1141 *Aft* is designated as *Aft/Aft*, homozygous LA1141 *atv* is designated as *atv/atv*, and homozygous LA1141 *u* is designated as *U/U*. Notation follows previous publications Cao et al., 2017. **A.** LA1141 mature green fruit (*Aft/Aft*; *atv/atv*; *U/U*) **B.** Inbred backcross line (IBL) SG18-200 (*Aft/Aft*; *ATV/ATV*; *u/u*) **C.** IBL SG18-124 (*Aft/Aft*; *atv/atv*; *U/U*) **D.** IBL SG18-251 (*AFT/AFT*; *ATV/ATV*; *U/U*).

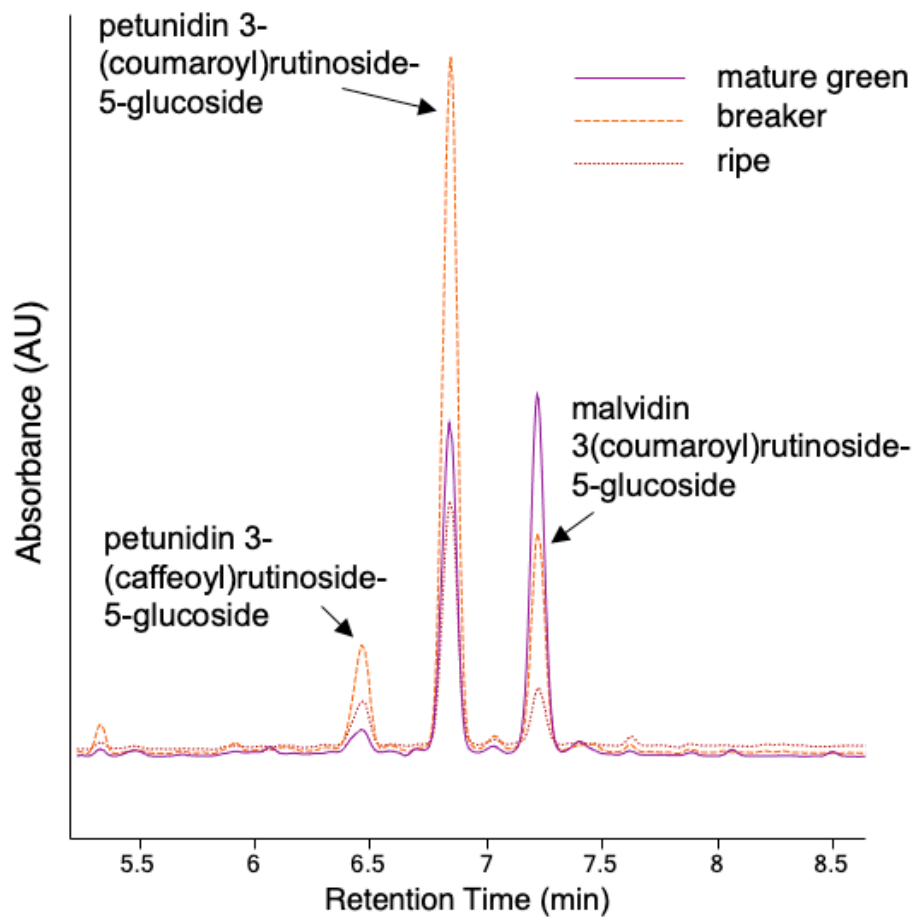

**Fig. 2.** Predominant pigments in the fruit of LA1141 derived lines. The chromatograms show ultra-high performance liquid chromatography separation and photo diode array (UHPLC-PDA) absorbance at 520 nm for fruit from mature green, breaker, and ripe fruit. The predominant peaks were identified as anthocyanins and are labeled above.



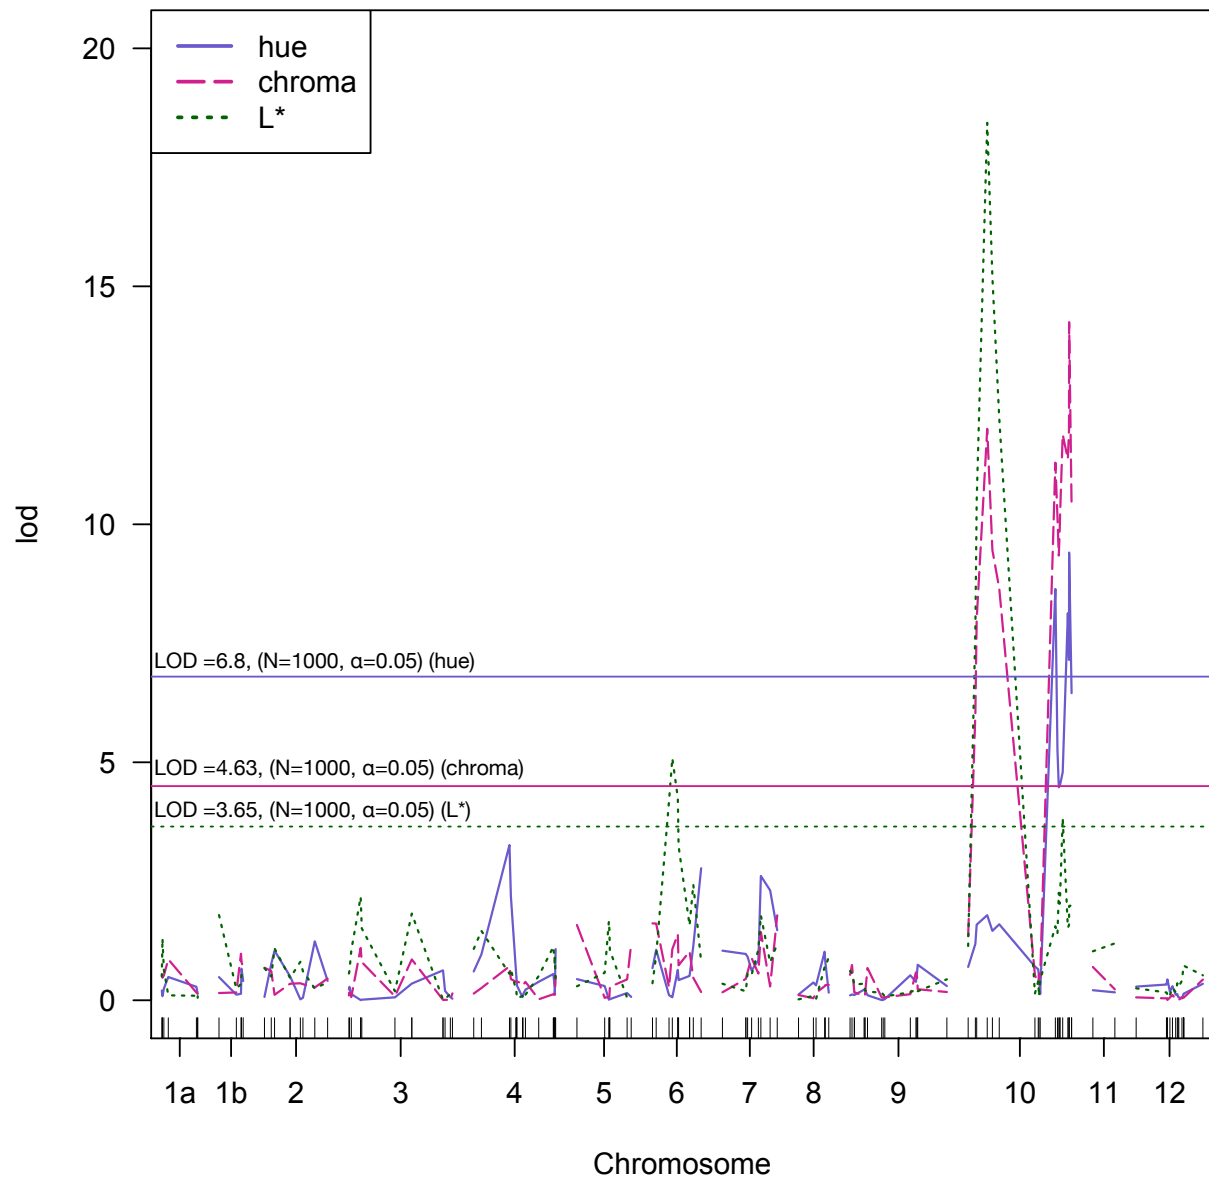

**Fig. 3.** Composite interval mapping (CIM) of fruit color measured as hue (violet), chroma (pink), and L\* (green, dotted) in the LA1141 x OH8245 BC<sub>2</sub>S<sub>3</sub> inbred backcross population. The y-axis is the logarithm of the odds (LOD). The horizontal lines are the resampled LOD significance cutoff ( $\alpha=0.05$ , N=1000 permutations) for hue (violet), chroma (pink) and L\* (green, dotted). The x-axis represents the 12 chromosomes in tomato and chromosome distance in cM was calculated using the Kosambi function to correct for multiple crossovers.

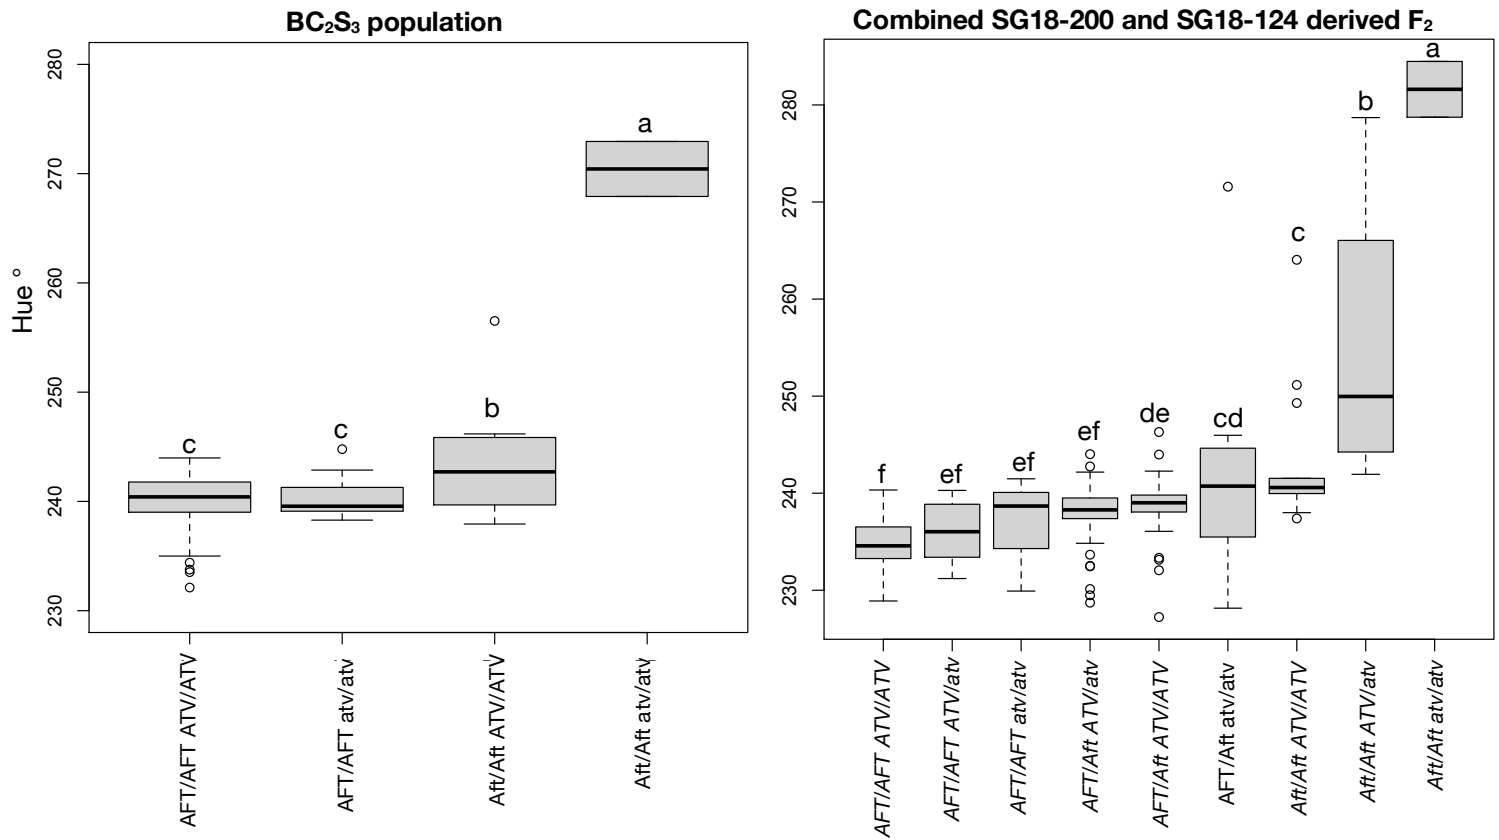

**Fig. 4.** Box plots represent interactions between the *Anthocyanin fruit* and *atrorivoliacium* loci. The x-axis is marker-locus genotypic class, and the y-axis is degrees of hue. **(A)** The interaction is shown in the BC<sub>2</sub>S<sub>3</sub> population and **(B)** the combined F<sub>2</sub> validation populations. For the *Anthocyanin fruit* locus: homozygous LA1141 alleles are abbreviated as *Aft/Aft*, heterozygous alleles as *AFT/aft*, and homozygous OH8245 *AFT/AFT*. For the *atrorivoliacium* locus: homozygous LA1141 alleles are abbreviated as *atv/atv*, heterozygous alleles as *ATV/atv*, and homozygous OH8245 *ATV/ATV*. Different letters indicate statistically significant differences among groups (Tukey's Honest Significant Difference (HSD), P < 0.05). Marker-locus genotypic class notation follows previous publications (Cao et al. 2017).

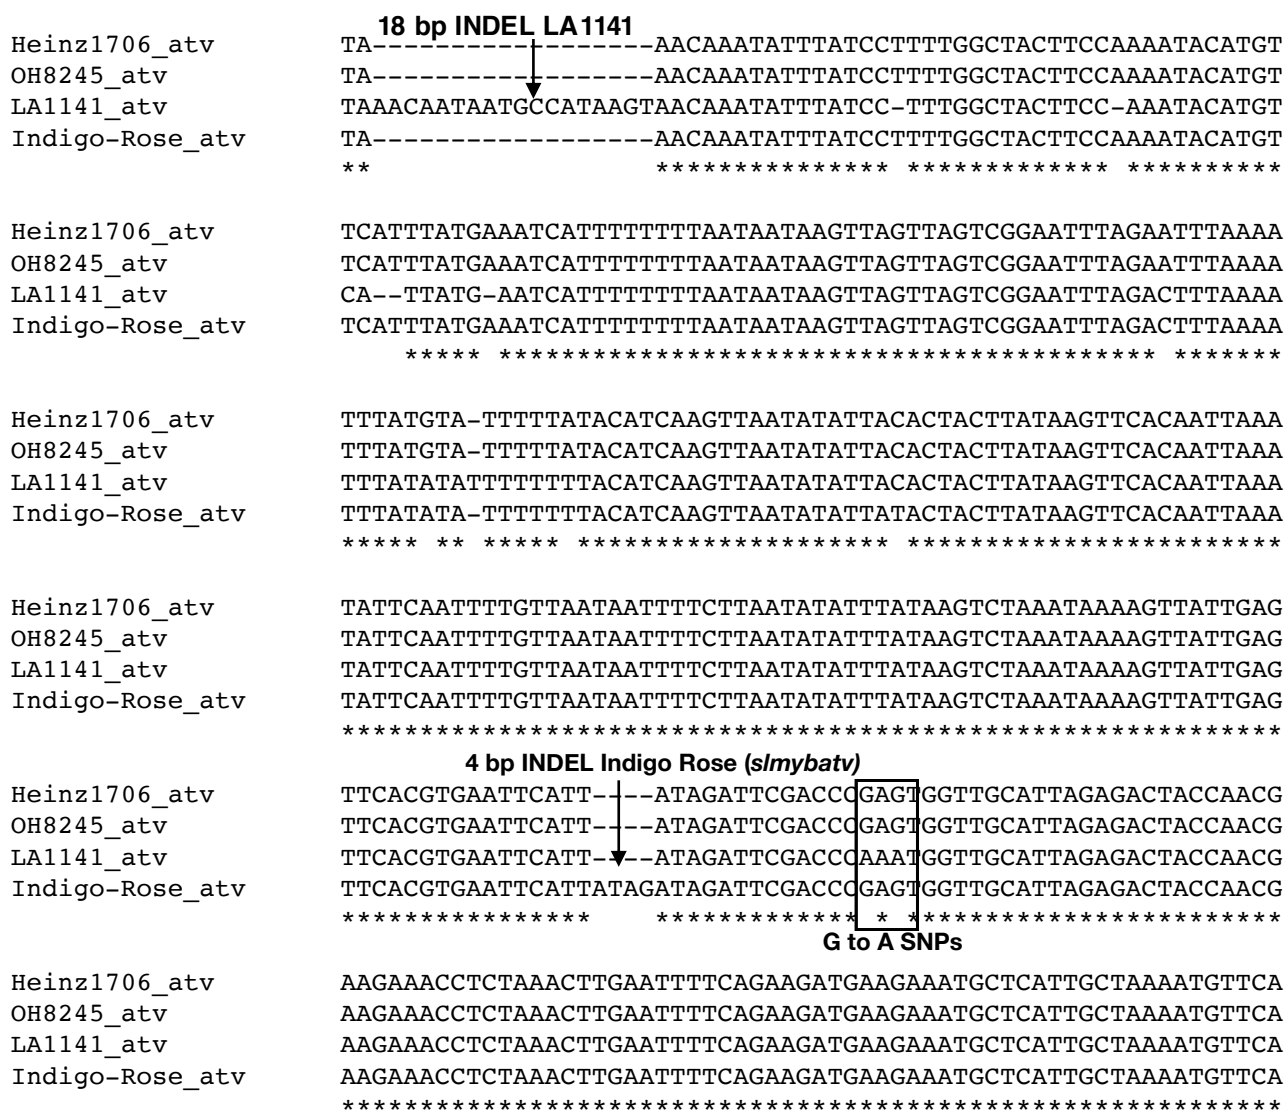

**Fig. 5.** Sequence polymorphism of selected genomic regions of the *atv* locus. A novel 18 bp insertion/deletion (INDEL) found in the first intron in LA1141 is highlighted (arrow). The causal 4 bp INDEL (*slmybatv*) previously characterized in the tomato cultivar Indigo Rose (Cao et al., 2017) is also highlighted (arrow). Two G to A SNPs in the coding region of the 2<sup>nd</sup> exon (**boxed**) are labeled (**bold**) in a region identified by CRISPR/CAS9 as important for the function of the conserved R3 domain (Yan et al., 2020). Sequences were aligned using MUSCLE (Edgar, 2004) using default settings. Conserved nucleotides are starred. The Heinz reference sequence (Heinz1706), OH8245, LA1141 and Indigo Rose genomic *atv* sequences are represented.

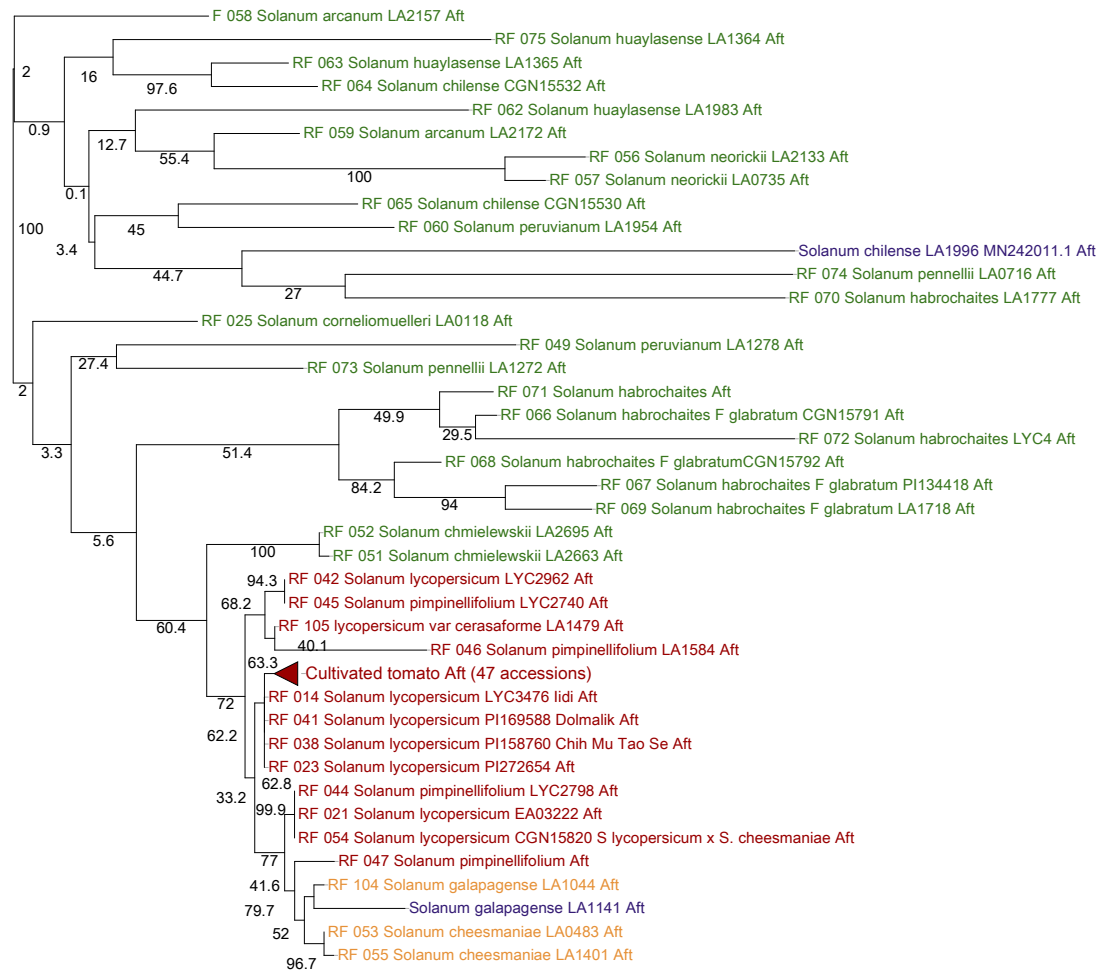

**Fig. 6** Midpoint rooted phylogenetic tree for MYB transcription factors underlying the *Aft* locus. The tree represents clustering of genomic sequences underlying *Aft* 84 unique tomato accessions from the 100 Tomato genome sequencing consortium, LA1996 (purple), OH8245 and LA1141 (purple) are clustered. A maximum likelihood midpoint rooted tree was constructed in the phangorn R package using the G.T.R model. Data resampling using 1000 rapid bootstrap replications was performed using the bootstrap.pml function and bootstrap values are given for each branch. There are 47 identical *S. lycopersicum* sequences are condensed under the name “Cultivated tomato Aft (47 accessions) (red triangle).

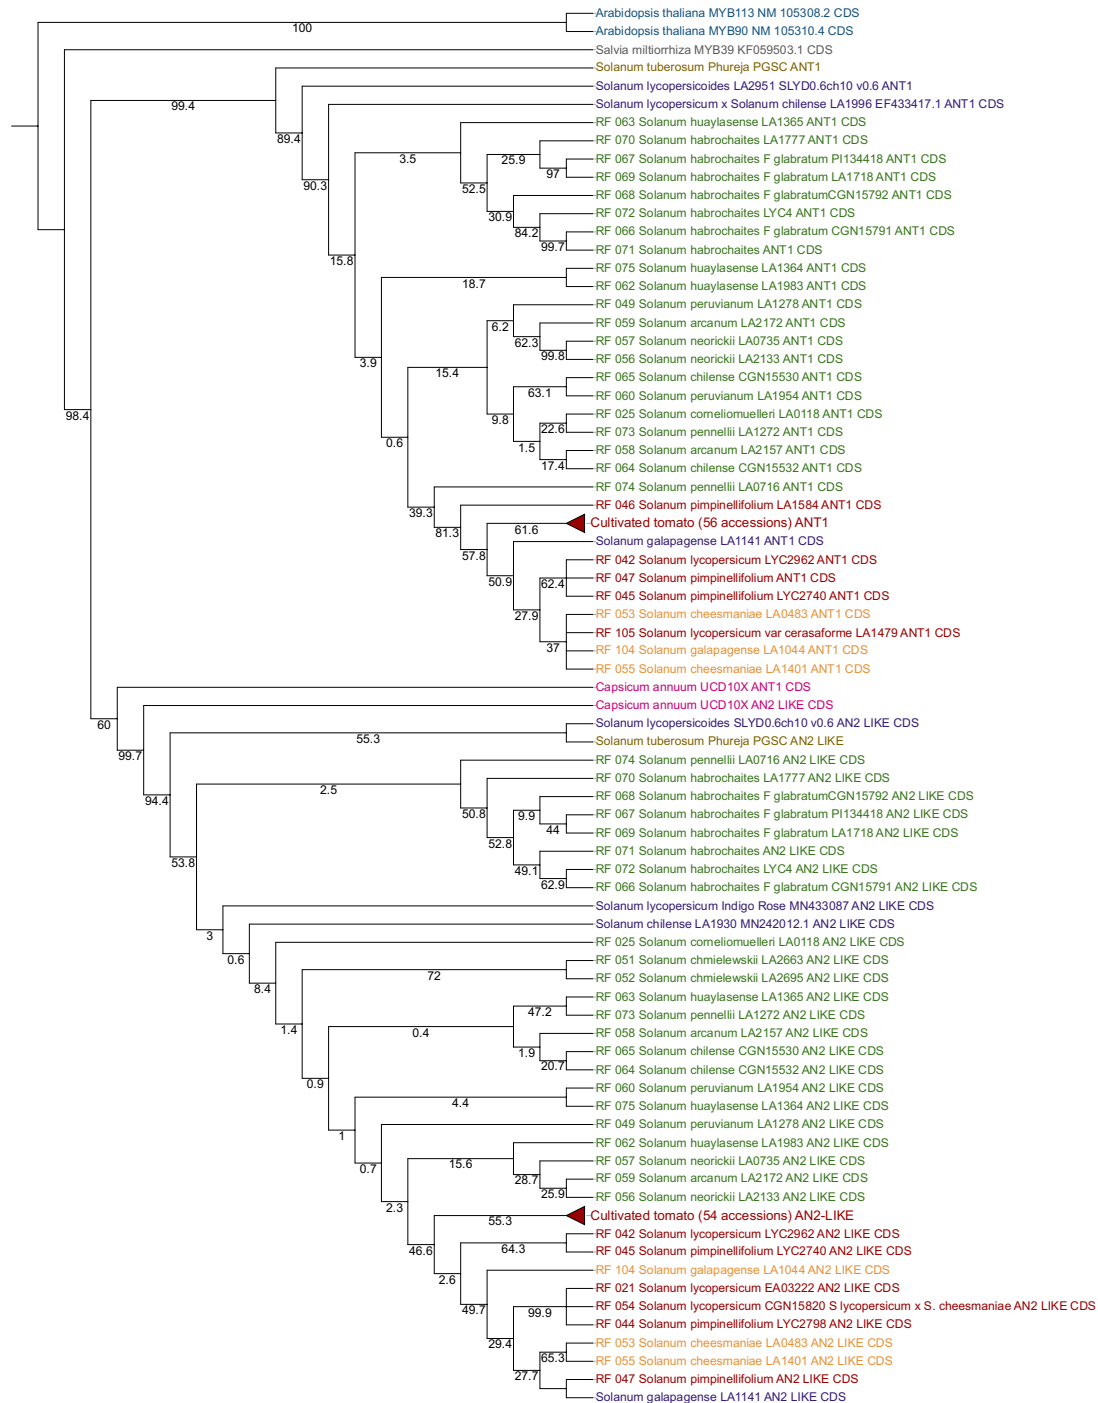

**Fig. 7** Outgroup rooted phylogenetic tree for MYB transcription factors underlying *Ant1* and *An2-like* coding sequence (CDS) at the *Aft* locus. *Arabidopsis thaliana*, *Salvia miltiorrhiza*, *S. tuberosa* Phureja, *C. annum*, *S. lycopersicum* variety Indigo Rose [MN433087 (Yan et al., 2020)], *S. chilense* accession LA1996 [MN242011.1, EF433417.1 (Sapir et al., 2008; Colanero et al., 2020a)], *S. chilense* (Dunal) Reiche (formerly *Lycopersicon chilense* Dunal) accession LA1930 [MN242012.1 (Colanero et al., 2020a)], 84 tomato accessions published as part of The 100 Tomato Genome Sequencing Consortium (The 100 Tomato Genome Sequencing Consortium, et al., 2014), *S. lycopersicum* variety OH8245, and *S. galapagense* accession LA1141 are clustered. Identical *S. lycopersicum* sequences are condensed (**red triangles**). A maximum likelihood tree was constructed in the phangorn R package (Schliep, 2011) using the G.T.R model. Data resampling using 1000 rapid bootstrap replications was performed using the bootstrap.pml function and bootstrap values are given for each branch. Trees were rooted at *Arabidopsis thaliana* MYB-encoding genes as the outgroup.



**Table 1.** Genetic map quality for the inbred backcross population (OH8245 × LA1141 BC<sub>2</sub>S<sub>3</sub>).

| <i>Genetic map</i>   |                   |                        |                                       |                                       | <i>Genetic map vs physical map (SI4.0) correlation</i> |                             |                      |
|----------------------|-------------------|------------------------|---------------------------------------|---------------------------------------|--------------------------------------------------------|-----------------------------|----------------------|
| <i>Linkage group</i> | Number of markers | Chromosome Length (cM) | Average distance between markers (cM) | Largest distance between markers (cM) | <sup>z</sup> P value                                   | <sup>y</sup> R <sup>2</sup> | <sup>x</sup> rho (ρ) |
| 1a                   | 8                 | 42.1                   | 6                                     | 33                                    | 0.0001                                                 | 0.9024                      | 1.000                |
| 1b                   | 6                 | 28.4                   | 5.7                                   | 20.4                                  | 0.0003                                                 | 0.9909                      | 1.000                |
| 2                    | 9                 | 74.2                   | 9.3                                   | 18.2                                  | 0.0000                                                 | 0.9789                      | 1.000                |
| 3                    | 14                | 121.6                  | 9.4                                   | 38.9                                  | 0.0000                                                 | 0.8900                      | 0.986                |
| 4                    | 27                | 96.2                   | 3.7                                   | 32.9                                  | 0.0000                                                 | 0.6554                      | 0.965                |
| 5                    | 8                 | 63.7                   | 9.1                                   | 32.6                                  | 0.0271                                                 | 0.5151                      | 1.000                |
| 6                    | 12                | 57.1                   | 5.2                                   | 15.1                                  | 0.0050                                                 | 0.6017                      | 1.000                |
| 7                    | 9                 | 64.3                   | 8                                     | 27.5                                  | 0.0131                                                 | 0.6416                      | 1.000                |
| 8                    | 6                 | 35.5                   | 7.1                                   | 17.5                                  | 0.0168                                                 | 0.7445                      | 1.000                |
| 9                    | 17                | 113.7                  | 7.1                                   | 34.3                                  | 0.0000                                                 | 0.8510                      | 1.000                |
| 10                   | 22                | 121.4                  | 5.8                                   | 41.9                                  | 0.0000                                                 | 0.8229                      | 1.000                |
| 11                   | 2                 | 25.8                   | 25.8                                  | 25.8                                  | NA                                                     | NA                          | NA                   |
| 12                   | 22                | 78.4                   | 3.7                                   | 35.6                                  | 0.0058                                                 | 0.2888                      | 1.000                |

<sup>z</sup>p value was derived from the regression equation (Genetic position ~ Physical position) based on markers physical position according to the *Solanum lycopersicum* (tomato) genome version 4.0 (Hosmani et al., 2019) and genetic distances calculated in the OH8245 × LA1141 BC<sub>2</sub>S<sub>3</sub> genetic map

<sup>y</sup> Adjusted correlation coefficient (R<sup>2</sup>) was derived from the regression equation (Genetic position ~ Physical position) based on markers physical position according to the *Solanum lycopersicum* (tomato) genome version 4.0 and genetic distances calculated in the OH8245 × LA1141 BC<sub>2</sub>S<sub>3</sub> population.

<sup>x</sup> rho (ρ) is the rank order correlation derived from the regression equation (Genetic position ~ Physical position) based on markers physical position according to the *Solanum lycopersicum* (tomato) genome version 4.0 and genetic distances calculated in the OH8245 × LA1141 BC<sub>2</sub>S<sub>3</sub> population.

**Table 2.** Markers associated with tomato fruit color.

| <b>LA1141 × OH8245 BC<sub>2</sub>S<sub>3</sub></b> |                                       |                  |              |                                         |                                                    |            |                                |
|----------------------------------------------------|---------------------------------------|------------------|--------------|-----------------------------------------|----------------------------------------------------|------------|--------------------------------|
| <sup>Z</sup> Trait                                 | Marker                                | <sup>Y</sup> LOD | Donor allele | <sup>X</sup> Allele substitution effect | <sup>W</sup> Percent phenotypic variance explained | Chromosome | <sup>V</sup> Physical position |
| hue                                                | BetaRSA ( <i>B</i> )                  | 2.74 (ns)        | LA1141       | 4.88                                    | 7.63                                               | 6          | 43562526                       |
|                                                    | atv_ex4 ( <i>atv</i> )                | 2.61 (ns)        | LA1141       | 3.94                                    | 7.30                                               | 7          | 61003154                       |
|                                                    | u_gal_3 ( <i>u</i> )                  | 2.65 (ns)        | LA1141       | 18.42                                   | 7.41                                               | 10         | 2293088                        |
|                                                    | solcap_snp_sl_100691                  | 7.15             | LA1141       | 6.74                                    | 22.63                                              | 10         | 64276927                       |
|                                                    | Ant1_1 ( <i>Aft</i> )                 | 9.4              | LA1141       | 7.50                                    | 24.04                                              | 10         | 64287679                       |
|                                                    | An2-like_exon2_intron2 ( <i>Aft</i> ) | 9.4              | LA1141       | 7.50                                    | 24.04                                              | 10         | 64317522                       |
|                                                    | solcap_snp_sl_8787                    | 6.45 (ns)        | LA1141       | 3.13                                    | 17.04                                              | 10         | 64366981                       |
| chroma                                             | BetaRSA ( <i>B</i> )                  | 0.173 (ns)       | LA1141       | -1.57                                   | 0.73                                               | 6          | 43562526                       |
|                                                    | atv_ex4 ( <i>atv</i> )                | 1.43 (ns)        | LA1141       | -3.97                                   | 3.42                                               | 7          | 61003154                       |
|                                                    | solcap_snp_sl_46386                   | 8                | LA1141       | -3.96                                   | 18.02                                              | 10         | 1610355                        |
|                                                    | u_gal_3 ( <i>u</i> )                  | 12               | LA1141       | -17.53                                  | 28.53                                              | 10         | 2293088                        |
|                                                    | solcap_snp_sl_34373                   | 9.45             | LA1141       | -3.90                                   | 20.5                                               | 10         | 3783034                        |
|                                                    | solcap_snp_sl_100691                  | 11.98            | LA1141       | -7.05                                   | 15.95                                              | 10         | 64276927                       |
|                                                    | Ant1_1 ( <i>Aft</i> )                 | 14.24            | LA1141       | -8.24                                   | 23.08                                              | 10         | 64287679                       |
|                                                    | An2-like_exon2_intron2 ( <i>Aft</i> ) | 14.24            | LA1141       | -8.42                                   | 23.08                                              | 10         | 64317522                       |
| solcap_snp_sl_8787                                 | 10.37                                 | LA1141           | -6.26        | 14.19                                   | 10                                                 | 64366981   |                                |
| L*                                                 | solcap_snp_sl_14458                   | 4.18             | LA1141       | -4.53                                   | 8.87                                               | 6          | 36520866                       |
|                                                    | solcap_snp_sl_1337                    | 5.08             | LA1141       | -5.05                                   | 10.13                                              | 6          | 37305722                       |
|                                                    | solcap_snp_sl_12757                   | 4.25             | LA1141       | -5.04                                   | 8.24                                               | 6          | 38186675                       |
|                                                    | BetaRSA ( <i>B</i> )                  | 1.26 (ns)        | LA1141       | -5.62                                   | 3.57                                               | 6          | 43562526                       |
|                                                    | atv_ex4 ( <i>atv</i> )                | 1.48 (ns)        | LA1141       | -5.08                                   | 4.17                                               | 7          | 6112941                        |
|                                                    | solcap_snp_sl_46386                   | 8.64             | LA1141       | -5.14                                   | 22.03                                              | 10         | 1610355                        |
|                                                    | u_gal_3 ( <i>u</i> )                  | 15.25            | LA1141       | -9.32                                   | 35.53                                              | 10         | 2293088                        |
|                                                    | solcap_snp_sl_34373                   | 12.43            | LA1141       | -5.27                                   | 30.08                                              | 10         | 3783034                        |
|                                                    | Ant1_1 ( <i>Aft</i> )                 | 1.13 (ns)        | LA1141       | -4.21                                   | 3.2                                                | 10         | 64287679                       |
|                                                    | An2-like_exon2_intron2 ( <i>Aft</i> ) | 1.13 (ns)        | LA1141       | -4.21                                   | 3.2                                                | 10         | 64317522                       |

<sup>Z</sup> Color was measured as hue, chroma, and L\* in the OH8245 × LA1141 BC<sub>2</sub>S<sub>3</sub> population.

<sup>Y</sup> LOD significance cutoffs were determined by a resampling of the data ( $\alpha=0.05$ ,  $N=1000$  permutations). LOD cutoffs for traits were hue (LOD= 6.8), chroma (LOD= 4.5) and L\* (LOD= 3.65).

<sup>X</sup> Genetic effects were evaluated as differences between phenotype averages expressed as regression coefficients.

<sup>W</sup> Percent variance explained was estimated by  $1 - 10^{-2 \text{LOD} / n}$ , where  $n$  is the sample size and LOD is the LOD score

<sup>V</sup> Physical position in base pairs corresponds to the Tomato Genome version SL4.0 (Hosmani et al., 2019).

<sup>1</sup>**Table 3.** Candidate gene associations validated in subsequent F<sub>2</sub> populations.

| <b>SG18-124 IBL derived F<sub>2</sub> validation population</b> |                                       |                      |               |                                         |                             |            |                                |
|-----------------------------------------------------------------|---------------------------------------|----------------------|---------------|-----------------------------------------|-----------------------------|------------|--------------------------------|
| <sup>z</sup> Trait                                              | Marker                                | <sup>y</sup> P value | Parent allele | <sup>x</sup> Allele substitution effect | <sup>w</sup> R <sup>2</sup> | Chromosome | <sup>v</sup> Physical position |
| hue                                                             | BetaRSA ( <i>B</i> )                  | 0.103 (ns)           | LA1141        | -0.63                                   | 0.04                        | 6          | 43562526                       |
|                                                                 | atv_ex4 ( <i>atv</i> )                | 0.022                | LA1141        | 11.99                                   | 0.09                        | 7          | 61003154                       |
|                                                                 | u_gal_3 ( <i>u</i> )                  | .901 (ns)            | LA1141        | 0.4026                                  | -0.02                       | 10         | 2293088                        |
|                                                                 | Ant1_1 ( <i>Aft</i> )                 | <0.000               | LA1141        | 19.45                                   | 0.37                        | 10         | 64287679                       |
|                                                                 | An2-like_exon2_intron2 ( <i>Aft</i> ) | <0.000               | LA1141        | 22.05                                   | 0.37                        | 10         | 64366981                       |
| Chroma                                                          | BetaRSA ( <i>B</i> )                  | 0.842 (ns)           | LA1141        | -1.47                                   | -0.02                       | 6          | 43562526                       |
|                                                                 | atv_ex4 ( <i>atv</i> )                | 0.06 (ns)            | LA1141        | -6.62                                   | 0.06                        | 7          | 61003154                       |
|                                                                 | u_gal_3 ( <i>u</i> )                  | <0.000               | LA1141        | -10.67                                  | 0.23                        | 10         | 2293088                        |
|                                                                 | Ant1_1 ( <i>Aft</i> )                 | <0.000               | LA1141        | -12.23                                  | 0.27                        | 10         | 64287679                       |
|                                                                 | An2-like_exon2_intron2 ( <i>Aft</i> ) | <0.000               | LA1141        | -10.80                                  | 0.14                        | 10         | 64366981                       |
| L*                                                              | BetaRSA ( <i>B</i> )                  | 0.715 (ns)           | LA1141        | -2.41                                   | -0.02                       | 6          | 43562526                       |
|                                                                 | atv_ex4 ( <i>atv</i> )                | 0.452 (ns)           | LA1141        | -3.65                                   | -0.01                       | 7          | 61003154                       |
|                                                                 | u_gal_3 ( <i>u</i> )                  | <0.000               | LA1141        | -10.38                                  | 0.17                        | 10         | 2293088                        |
|                                                                 | Ant1_1 ( <i>Aft</i> )                 | 0.136 (ns)           | LA1141        | -4.24                                   | 0.02                        | 10         | 64287679                       |
|                                                                 | An2-like_exon2_intron2 ( <i>Aft</i> ) | 0.1876 (ns)          | LA1141        | -4.55                                   | 0.01                        | 10         | 64366981                       |
| <b>SG18-200 IBL derived F<sub>2</sub> validation population</b> |                                       |                      |               |                                         |                             |            |                                |
| hue                                                             | BetaRSA ( <i>B</i> )                  | 0.001                | LA1141        | 3.23                                    | 0.14                        | 6          | 43562526                       |
|                                                                 | atv_ex4 ( <i>atv</i> ) (monomorphic)  | NA                   | OH8245        | NA                                      | NA                          | 7          | 61003154                       |
|                                                                 | u_gal_3 ( <i>u</i> ) (monomorphic)    | NA                   | OH8245        | NA                                      | NA                          | 10         | 2293088                        |
|                                                                 | Ant1_1 ( <i>Aft</i> )                 | <0.000               | LA1141        | 4.36                                    | 0.17                        | 10         | 64287679                       |
|                                                                 | An2-like_exon2_intron2 ( <i>Aft</i> ) | <0.000               | LA1141        | 5.03                                    | 0.23                        | 10         | 64366981                       |
| chroma                                                          | BetaRSA ( <i>B</i> )                  | 0.06 (ns)            | LA1141        | -2.53                                   | 0.04                        | 6          | 43562526                       |
|                                                                 | atv_ex4 ( <i>atv</i> ) (monomorphic)  | NA                   | OH8245        | NA                                      | NA                          | 7          | 61003154                       |
|                                                                 | u_gal_3 ( <i>u</i> ) (monomorphic)    | NA                   | OH8245        | NA                                      | NA                          | 10         | 2293088                        |
|                                                                 | Ant1_1 ( <i>Aft</i> )                 | <0.000               | LA1141        | -9.04                                   | 0.48                        | 10         | 64287679                       |
|                                                                 | An2-like_exon2_intron2 ( <i>Aft</i> ) | <0.000               | LA1141        | -9.15                                   | 0.52                        | 10         | 64366981                       |
| L*                                                              | BetaRSA ( <i>B</i> )                  | 0.186 (ns)           | LA1141        | -1.97                                   | 0.01                        | 6          | 43562526                       |
|                                                                 | atv_ex4 ( <i>atv</i> ) (monomorphic)  | NA                   | OH8245        | NA                                      | NA                          | 7          | 61003154                       |
|                                                                 | u_gal_3 ( <i>u</i> ) (monomorphic)    | NA                   | OH8245        | NA                                      | NA                          | 10         | 2293088                        |
|                                                                 | Ant1_1 ( <i>Aft</i> )                 | <0.000               | LA1141        | -6.15                                   | 0.24                        | 10         | 64287679                       |
|                                                                 | An2-like_exon2_intron2 ( <i>Aft</i> ) | <0.000               | LA1141        | -5.75                                   | 0.25                        | 10         | 64366981                       |

<sup>z</sup> Color was measured as hue, chroma, and L\* in the BC<sub>2</sub>S<sub>3</sub> IBL derived F<sub>2</sub> populations.

<sup>y</sup> ANOVAs were conducted, and F-tests were used to determine if significant variation in hue, chroma, and L\* was associated with differences in marker-locus genotypic classes. If NA, the marker was not segregating in the population and therefore could not be tested for differences in marker-locus genotypic classes.

<sup>x</sup> F-tests to determine if hue, chroma, and L\* were associated with significant differences in marker-locus genotypic classes and used the line mean differences to estimate the effect of allele substitutions.

<sup>w</sup> Adjusted correlation coefficient (R<sup>2</sup>) calculated from linear model analysis of variance (ANOVA) is the percent of total phenotypic variance explained.

<sup>v</sup> Physical position in base pairs corresponds to the Tomato Genome version SL4.0 (Hosmani et al., 2019).
